# Supplementary material for: Heated tobacco product use and hypertensive disorders of pregnancy and low birth weight: analysis of a cross-sectional, web-based survey in Japan
Source: PubMed Central journal article supplement — BMJ Open. 2021 Sep 21;11(9):e052976. doi: 10.1136/bmjopen-2021-052976 (PMC8458368; doi:10.1136/bmjopen-2021-052976), 2021-09-21
Supplement: bmjopen-2021-052976.draft_revisions.pdf [file bmjopen-2021-052976.draft_revisions.pdf]

# BMJ Open

BMJ Open is committed to open peer review. As part of this commitment we make the peer review history of every article we publish publicly available.

When an article is published we post the peer reviewers' comments and the authors' responses online. We also post the versions of the paper that were used during peer review. These are the versions that the peer review comments apply to.

The versions of the paper that follow are the versions that were submitted during the peer review process. They are not the versions of record or the final published versions. They should not be cited or distributed as the published version of this manuscript.

BMJ Open is an open access journal and the full, final, typeset and author-corrected version of record of the manuscript is available on our site with no access controls, subscription charges or pay-per-view fees (<http://bmjopen.bmj.com>).

If you have any questions on BMJ Open's open peer review process please email [info.bmjopen@bmj.com](mailto:info.bmjopen@bmj.com)

# BMJ Open

## Use of heated tobacco products may be associated with hypertensive disorders of pregnancy and low birth weight in Japan: An analysis of the JACSIS study

|                               |                                                                                                                                                                                                                                                                                                                                                                                                                                                                                                                                          |
|-------------------------------|------------------------------------------------------------------------------------------------------------------------------------------------------------------------------------------------------------------------------------------------------------------------------------------------------------------------------------------------------------------------------------------------------------------------------------------------------------------------------------------------------------------------------------------|
| Journal:                      | <i>BMJ Open</i>                                                                                                                                                                                                                                                                                                                                                                                                                                                                                                                          |
| Manuscript ID                 | bmjopen-2021-052976                                                                                                                                                                                                                                                                                                                                                                                                                                                                                                                      |
| Article Type:                 | Original research                                                                                                                                                                                                                                                                                                                                                                                                                                                                                                                        |
| Date Submitted by the Author: | 30-Apr-2021                                                                                                                                                                                                                                                                                                                                                                                                                                                                                                                              |
| Complete List of Authors:     | Zaitzu, Masayoshi ; Dokkyo Medical University, Department of Public Health<br>Hosokawa, Yoshihiko; Dokkyo Medical University, Department of Public Health; University of Tsukuba, Department of Obstetrics and Gynecology<br>Okawa, Sumiyo; Osaka Medical Center for Cancer and Cardiovascular Diseases<br>Hori, Ai; University of Tsukuba, Department of Global Public Health<br>Kobashi, Gen; Dokkyo Medical University, Department of Public Health<br>Tabuchi, Takahiro; Osaka Medical Center for Cancer and Cardiovascular Diseases |
| Keywords:                     | COVID-19, Fetal medicine < OBSTETRICS, Maternal medicine < OBSTETRICS, PUBLIC HEALTH, TOXICOLOGY, Epidemiology < THORACIC MEDICINE                                                                                                                                                                                                                                                                                                                                                                                                       |
|                               |                                                                                                                                                                                                                                                                                                                                                                                                                                                                                                                                          |

SCHOLARONE™  
Manuscripts

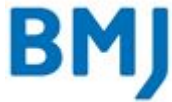

I, the Submitting Author has the right to grant and does grant on behalf of all authors of the Work (as defined in the below author licence), an exclusive licence and/or a non-exclusive licence for contributions from authors who are: i) UK Crown employees; ii) where BMJ has agreed a CC-BY licence shall apply, and/or iii) in accordance with the terms applicable for US Federal Government officers or employees acting as part of their official duties; on a worldwide, perpetual, irrevocable, royalty-free basis to BMJ Publishing Group Ltd ("BMJ") its licensees and where the relevant Journal is co-owned by BMJ to the co-owners of the Journal, to publish the Work in this journal and any other BMJ products and to exploit all rights, as set out in our [licence](#).

The Submitting Author accepts and understands that any supply made under these terms is made by BMJ to the Submitting Author unless you are acting as an employee on behalf of your employer or a postgraduate student of an affiliated institution which is paying any applicable article publishing charge ("APC") for Open Access articles. Where the Submitting Author wishes to make the Work available on an Open Access basis (and intends to pay the relevant APC), the terms of reuse of such Open Access shall be governed by a Creative Commons licence – details of these licences and which [Creative Commons](#) licence will apply to this Work are set out in our licence referred to above.

Other than as permitted in any relevant BMJ Author's Self Archiving Policies, I confirm this Work has not been accepted for publication elsewhere, is not being considered for publication elsewhere and does not duplicate material already published. I confirm all authors consent to publication of this Work and authorise the granting of this licence.

1  
2  
3 **1 Use of heated tobacco products may be associated with hypertensive disorders of**  
4  
5 **2 pregnancy and low birth weight in Japan: An analysis of the JACSIS study**  
6  
7  
8  
9

10 4 Masayoshi Zaitu,<sup>1,\*</sup> Yoshihiko Hosokawa,<sup>1,2,\*</sup> Sumiyo Okawa,<sup>3</sup> Ai Hori,<sup>4</sup> Gen Kobashi,<sup>1</sup>  
11  
12 5 Takahiro Tabuchi<sup>3</sup>  
13  
14  
15  
16

17 7 <sup>1</sup> Department of Public Health, School of Medicine, Dokkyo Medical University, Tochigi,  
18  
19 8 Japan

20  
21 9 <sup>2</sup> Department of Obstetrics and Gynecology, Faculty of Medicine, University of Tsukuba,  
22  
23 10 Ibaraki, Japan

24  
25  
26 11 <sup>3</sup> Cancer Control Center, Osaka Medical Center for Cancer and Cardiovascular Diseases,  
27  
28 12 Osaka, Japan

29  
30 13 <sup>4</sup> Department of Global Public Health, University of Tsukuba, Tsukuba, Ibaraki, Japan

31  
32  
33 14 \* These authors contributed equally to this work.  
34  
35  
36  
37

38 16 **Corresponding author:** Masayoshi Zaitu, MD, PhD

39  
40 17 Department of Public Health, School of Medicine, Dokkyo Medical University

41  
42 18 880 Kitakobayashi, Mibu, Shimotsuga-gun, Tochigi, 321-0293 Japan

43  
44 19 Tel: +81-282-87-2133; Fax: +81-282-86-2935

45  
46 20 Email: m-zaitu@dokkyomed.ac.jp

47  
48  
49 21 ORCID: [orcid.org/0000-0001-7616-355X](https://orcid.org/0000-0001-7616-355X)  
50  
51  
52  
53

54 23 **Word count:** 2213  
55  
56  
57  
58  
59  
60

1  
2  
3 24 **ABSTRACT**  
4

5 25 **Background:** Little is known about heated tobacco product (HTP) use in pregnant women  
6  
7  
8 26 and associated maternal and neonatal risks for hypertensive disorders of pregnancy (HDP)  
9  
10 27 and low birth weight (LBW). Thus, this study aimed to assess the status of HTP use among  
11  
12 28 pregnant women in Japan and explore the risk of HDP and LBW associated with HTP use.

13  
14 29 **Methods:** Using data from the Japan “COVID-19 and Society” Internet Survey (JACSIS)  
15  
16  
17 30 study, a web-based nationwide survey, we investigated 558 post-delivery and 365 currently  
18  
19 31 pregnant women in October 2020. We assessed the prevalence of ever HTP smokers (defined  
20  
21 32 as ever experiencing HTP use) in post-delivery and currently pregnant women. Among post-  
22  
23 33 delivery women, we collected the information regarding HDP and LBW based on their  
24  
25 34 Maternal and Child Health Handbooks (maternal and newborn records). In the multivariable  
26  
27 35 regression analysis, we estimated the adjusted odds ratios (ORs) and 95% confidence  
28  
29 36 intervals (CIs) of ever HTP smokers for HDP and LBW compared with those of never HTP  
30  
31 37 smokers using logistic regression. A stratified analysis with respect to combustible cigarette  
32  
33 38 smoking (never/ever) was also performed.

34  
35 39 **Results:** The prevalence of ever HTP use were 11.7% and 12.6% in post-delivery and  
36  
37 40 currently pregnant women, respectively. Among post-delivery women, ever HTP smokers  
38  
39 41 had higher HDP incidence (13.8% vs. 6.5%,  $P=0.03$ ), with an OR of 2.78 (95% CI 0.84–  
40  
41 42 9.15) and higher LBW incidence (18.5% versus 8.9%,  $P=0.02$ ), with an elevated OR of 2.08  
42  
43 43 (95% CI 0.80–5.39). A similar tendency was observed among never and ever combustible  
44  
45 44 cigarette smokers.

46  
47 45 **Conclusion:** In Japan, the incidence of HTP use has exceeded 10% among pregnant women,  
48  
49 46 and HTP smoking may be associated with increased maternal and neonatal risks. School-  
50  
51 47 based tobacco prevention and cessation programs should be conducted regardless of product  
52  
53 48 types to prevent life-threatening perinatal complications and deaths.  
54  
55  
56  
57  
58  
59  
60

1  
2  
3 49 **Keywords:** heated tobacco products, hypertensive disorders of pregnancy, COVID-19,  
4  
5 50 smoking, preconception  
6  
7  
8 51

9  
10 52 **Strengths and limitations of this study:**  
11

- 12 53 ● Little is known about heated tobacco product (HTP) use and associated perinatal risks  
13  
14 among pregnant women.  
15  
16 54 ● In Japan, the prevalence of ever HTP use exceeded 10% among pregnant women.  
17  
18 55 ● HTP use approximately doubled perinatal risk of hypertensive disorders of pregnancy  
19  
20 and low birth weight based on maternal and newborn records.  
21  
22 56 ● When stratified by cigarette smoking status, a similar tendency was observed among  
23  
24 never and ever cigarette smokers.  
25  
26 57 ● The cross-sectional design does not allow firm conclusions.  
27  
28  
29  
30  
31 61

## 62 INTRODUCTION

63 The widespread use of heated tobacco products (HTPs) is an emerging public health  
64 concern.[1] Since the initial marketing of HTPs in 2014, the prevalence of HTP use has  
65 increased in Japan, exceeding 15% in the young population aged 20–39 years in 2019,[2] and  
66 this incidence was maintained over 15% during the coronavirus disease (COVID-19)  
67 pandemic in 2020.[3]

68 Although the impression of HTPs as a healthy alternative to combustible cigarettes is  
69 promoted by the advertising of HTPs (e.g., reduced harmfulness and a smoke-free image),[4]  
70 HTP-related unfavorable health outcomes, including acute respiratory and cardiovascular  
71 risks, are likely to occur.[5, 6] However, little is known about HTP use and associated  
72 maternal and neonatal risks in pregnant women, including hypertensive disorders of  
73 pregnancy (HDP) and low birth weight (LBW).[7, 8] Although some controversial  
74 associations have been reported for HDP with respect to combustible cigarettes,[9] this type  
75 of cigarettes increases various maternal and neonatal risks in Japan.[10, 11] Therefore, we  
76 hypothesized that HTP use is associated with HDP and LBW, regardless of combustible  
77 cigarette smoking.

78 This study aimed to assess the status of HTP use among pregnant women in Japan and  
79 explore the risk of HDP and LBW associated with the use of HTP by analyzing data from a  
80 nationwide web-based survey in Japan that contained pregnancy-related information and data  
81 related to behavioral factors (e.g., HTP use and combustible cigarette smoking), and social  
82 background.

## 85 MATERIALS AND METHODS

### 86 Data setting

1  
2  
3 87 This cross-sectional internet-based study is part of the Japan COVID-19 and Society Internet  
4  
5 88 Survey (JACSIS) study. The JACSIS study comprises three surveys in the following three  
6  
7  
8 89 target populations: (a) young people and adults aged 15–79 years, (b) currently pregnant and  
9  
10 90 post-delivery women, and (c) adults living in a single-parent household. The study samples  
11  
12 91 for each survey were retrieved from the pooled panels of an internet research agency  
13  
14 92 (Rakuten Insight, Inc., which had approximately 2.2 million panelists in 2019).[12] We used  
15  
16 93 data from currently pregnant and post-delivery women, which were collected in October  
17  
18  
19 94 2020.

20  
21 95 The internet research agency identified 21,896 eligible women, randomly selected 4373  
22  
23 96 women who gave birth after October 2019 or who were expected to give birth by March  
24  
25 97 2021, and distributed the questionnaire comprising 61 questions to the selected women  
26  
27 98 through a designated website. Next, we collected data from 1000 women (response rate,  
28  
29 99 22.9%) stratified by delivery date as follows: (a) 600 post-delivery women who delivered  
30  
31 100 during October 2019–March 2020 (n=200), April–May 2020 (n=200), and June–October  
32  
33 101 2020 (n=200) and (b) 400 currently pregnant women who were expected to deliver during  
34  
35 102 October 2020–March 2021. Among 1000 study participants, we excluded 77 who provided  
36  
37 103 irrelevant or conflicting information (45 post-delivery and 32 currently pregnant women) as  
38  
39 104 done in previous studies of the same research agency,[13] yielding a total of 923 study  
40  
41 105 participants for the analysis (558 post-delivery and 365 currently pregnant women). Informed  
42  
43 106 consent was obtained electronically, and the Institutional Review Board of the Osaka  
44  
45 107 International Cancer Institute approved the study (Protocol Number 20084).  
46  
47  
48  
49  
50  
51  
52  
53

#### 109 **Definition of HDP and LBW**

54  
55 110 Data on HDP and LBW were extracted from the web-based self-reported questionnaires. We  
56  
57 111 defined the incidence of HDP based on whether the study participants had been diagnosed as  
58  
59  
60



1  
2  
3 112 having HDP or preeclampsia during pregnancy. The criteria for HDP diagnosis in Japan were  
4  
5 113 derived from the criteria of the American College of Obstetricians and Gynecologists (i.e.,  
6  
7 114 systolic blood pressure  $\geq 140$  mmHg or diastolic blood pressure  $\geq 90$  mmHg after the 20th  
8  
9 115 week of gestation).[14] We defined the incidence of LBW on the basis of the diagnosis of  
10  
11 116 LBW (birth weight  $< 2500$  g).

12  
13  
14 117 All participants were asked to provide information from their Maternal and Child  
15  
16 118 Health Handbooks. In brief, as previously described,[15, 16] the Maternal and Child Health  
17  
18 119 Handbooks are well-established integrated home-based records of maternal, newborn, and  
19  
20 120 child health. As a part of a national maternal and child health policy, all municipalities issue a  
21  
22 121 handbook to all women who report a pregnancy, and medical professionals record the health  
23  
24 122 information of the mother and child, including clinical outcomes (e.g., blood pressure and  
25  
26 123 birth weight) and incident diagnoses (e.g., HDP and LBW) during pregnancy. Mothers  
27  
28 124 seldom lose their Maternal and Child Health Handbooks (losing rate,  $< 1\%$ ).[15]  
29  
30  
31  
32

### 33 125

### 34 126 **HTP and cigarette smoking and other covariates**

35  
36 127 In the questionnaire, study participants were asked to indicate their smoking status (never,  
37  
38 128 once or a few times but not habitually, former, sometimes, or every day) for each HTP  
39  
40 129 available in the study period (Ploom Tech, Ploom Tech plus, Ploom S, IQOS, glo, glo sens,  
41  
42 130 and PULZE). If they answered “never” for all HTPs, we defined them as never HTP smokers;  
43  
44 131 the remaining participants were considered ever HTP smokers.  
45  
46  
47  
48

49 132 We also classified the status of combustible cigarette smoking (never/ever). For other  
50  
51 133 covariates, we included age, educational attainment ( $\leq 12$  years [high school] or  $\geq 13$  years  
52  
53 134 [college or university]), occupation (manager or others), household income ( $< 2$  million JPY  
54  
55 135 [approximately 20,000 USD], 2 to  $< 6$  million JPY, and  $\geq 6$  million JPY), and comorbidity  
56  
57 136 (having hypertension or diabetes).[17]  
58  
59  
60

1  
2  
3 1374  
5  
6 138 **Statistical analysis**

7  
8 139 Descriptive statistics were computed, and t-test or chi-squared test was performed. We  
9  
10 140 assessed the prevalence of ever HTP smokers among post-delivery and currently pregnant  
11  
12 141 women. Additionally, we described detailed HTP smoking status cross-classified according  
13  
14 142 to the combustible cigarette smoking status of currently pregnant and post-delivery women.

15  
16  
17 143 To assess the potential association between HTP smoking and perinatal risk of HDP  
18  
19 144 and LBW, we restricted the sample to 558 post-delivery women who could complete all the  
20  
21 145 assessments during their pregnancy (Table 1). In the multivariable logistic regression  
22  
23 146 analyses, the odds ratio (OR) and 95% confidence interval (CI) of ever HTP smokers for  
24  
25 147 HDP risk were estimated with adjustment for age (model 1, the main model in the present  
26  
27 148 study). The reference group comprised never HTP smokers. In model 2, we fully adjusted for  
28  
29 149 other explanatory variables (combustible cigarette smoking, educational attainment,  
30  
31 150 occupation, household income, and comorbidity) and excluded 64 participants with missing  
32  
33 151 information on household income. The same analyses were performed for LBW. For  
34  
35 152 sensitivity analysis, we conducted a stratified analysis with respect to combustible cigarette  
36  
37 153 smoking (never/ever).

38  
39  
40  
41  
42 154 Alpha was set at 0.05, and all *P*-values were two sided. Data were analyzed using  
43  
44 155 STATA/MP13.1 (StataCorp LLC, College Station, TX).

45  
46  
47 15648  
49 157 **Patient and Public Involvement**

50  
51 158 No patients or the public involved.

52  
53  
54 15955  
56 16057  
58 161 **RESULTS**59  
60

1  
2  
3 162 Among 558 post-delivery women, the incidences of HDP and LBW were 7.3% (n=41) and  
4  
5 163 10.0% (n=56), respectively, and the prevalence of ever HTP smokers was 11.7% (n=65,  
6  
7  
8 164 Table 1). Furthermore, among 365 currently pregnant women, the prevalence of ever HTP  
9  
10 165 smokers was 12.6% (n=46), which did not differ from that of HTP smokers among post-  
11  
12 166 delivery women ( $P=0.66$ ). Among currently pregnant women, 4.4% of former combustible  
13  
14 167 cigarette smokers reported smoking HTPs during pregnancy (Table 2), corresponding to  
15  
16 168 1.1% (4 out of 365) of current HTP smokers.

17  
18  
19 169 Among post-delivery women, the HDP incidence was higher in ever HTP smokers than  
20  
21 170 in never HTP smokers (13.8% vs. 6.5%; Table 1). Similarly, the incidence of LBW was  
22  
23 171 higher among ever HTP smokers than among never HTP smokers (18.5% vs. 8.9%, Table 1).  
24  
25 172 When stratified by combustible cigarette smoking, a similar tendency was observed among  
26  
27 173 never and ever combustible cigarette smokers (Table 1).  
28  
29

30  
31 174 In the regression analysis, the age-adjusted ORs for HDP and LBW were elevated in  
32  
33 175 ever HTP smokers (model 1, Figure 1); the ORs for HDP and LBW were 2.48 (95% CI,  
34  
35 176 1.11–5.53) and 2.36 (95% CI, 1.16–4.78), respectively. Although the elevated ORs were  
36  
37 177 attenuated after fully controlling for other covariates, the tendency remained elevated (model  
38  
39 178 2, Figure 1). In the same regression analyses (model 2), while ever combustible cigarette  
40  
41 179 smokers did not predict perinatal outcomes, managerial workers predicted the incidence of  
42  
43 180 HDP and LBW; the ORs for HDP and LBW were 3.92 (95% CI 1.16–13.2) and 3.74 (95% CI  
44  
45 181 1.41–9.93), respectively. When stratified by combustible cigarette smoking, a similar  
46  
47 182 tendency was observed independently in never and ever combustible cigarette smokers  
48  
49 183 (Figure 1). For instance, among never combustible cigarette smokers, the age-adjusted OR of  
50  
51 184 HTP use for LBW was 4.82 (95% CI, 1.19–19.6).  
52  
53  
54  
55  
56  
57  
58  
59  
60

## 187 **DISCUSSION**

188 During the COVID-19 pandemic in Japan, the incidence of HTP use among pregnant women  
189 is likely to exceed 10%, and we found that HTP use may be associated with perinatal risk of  
190 HDP and LBW. Although the impact was attenuated after controlling for other potential  
191 explanatory factors and the significance disappeared due to weak statistical power, the  
192 maternal risk might be high independent of combustible cigarette smoking. This result seems  
193 to be reliable because the incidence estimate of approximately 7% HDP found in our study  
194 (using Maternal and Child Health Handbooks) is consistent with the general statistics  
195 reported for Japanese pregnant women.[14] In addition, pregnant women of high  
196 socioeconomic status independently predicted the risk of HDP, which might also support our  
197 findings because they are known to use HTP more frequently than women of lower  
198 socioeconomic status.[17]

199 We also found that LBW, a well-known smoking-related neonatal risk,[18] was  
200 associated with HTP use. In fact, the incidence of HTP use doubled the risk of LBW, and the  
201 association was stronger among never combustible cigarette smokers. These results seem to  
202 be reliable because the incidence estimate of approximately 10% LBW found in our study  
203 (using Maternal and Child Health Handbooks) is consistent with the general statistics  
204 reported for Japanese pregnant women.[19] This also implies that aerosols of HTPs  
205 containing nicotine and other inhalable substances can cause acute adverse health events on  
206 the development of infants.

207 To the best of our knowledge, this is the first report of a potential association between  
208 HTP use and perinatal risks. Although smoking plays a controversial role,[9] recent evidence  
209 suggests that combustible cigarette smoking is associated with increased HDP risk.[10, 11]  
210 Another study also reported the risk of snuff use for preeclampsia, a severe phenotype of  
211 HDP.[20] Although the biological and genetic pathways (e.g., CYP2A6 and nicotine)

1  
2  
3 212 underlying the associations observed in different phenotypes of HDP (e.g., preeclampsia and  
4  
5 213 gestational hypertension) have not been elucidated,[21] HDP is recognized as a systemic  
6  
7 214 disease attributable to placental circulatory dysfunction.[22] In experimental research, aerosol  
8  
9  
10 215 from HTPs was found to damage vascular endothelial function in rats.[5] Therefore, HDP  
11  
12 216 risk associated with HTP use may involve acute and chronic vascular damage, irrespective of  
13  
14 217 combustible cigarette smoking. Furthermore, as concluded in a recent systematic review,  
15  
16 218 smoking is a strong risk factor for LBW.[18] Thus, given the fact that HTPs are smoking  
17  
18 219 devices, our observed results are in line with established knowledge.

21  
22 220 Finally, the impression of HTPs as a healthy alternative is promoted by the advertising  
23  
24 221 of HTPs.[4] Indeed, among currently pregnant women, approximately 4% of former  
25  
26 222 combustible cigarette smokers reported smoking HTPs in the present study. This result might  
27  
28 223 reflect a change from combustible cigarettes to HTP smoking during pregnancy. However,  
29  
30 224 our findings imply that HTP use is at least not a healthy alternative. Evidence for unfavorable  
31  
32 225 health outcomes regarding HTPs is still lacking, particularly in the young population of  
33  
34 226 reproductive age. Insufficient health knowledge may have led to the current increase of HTP  
35  
36 227 use among pregnant women, as reflected in our results and the latest statistics in Japan.[2, 3]  
37  
38 228 However, the question remains as to how multidimensional factors of the COVID-19  
39  
40 229 pandemic (e.g., the infection, mental health, and socioeconomic factors) and the smoking  
41  
42 230 behaviors of others (e.g., partners and family) affect the association between HTP use and  
43  
44 231 perinatal risks. Our sequential series of the JACSIS study planned in 2021 may provide  
45  
46 232 updates regarding the present results.

51  
52 233 Our study had some limitations. First, our cross-sectional design does not allow to  
53  
54 234 conclude causal mechanisms between HTP use and perinatal risks. However, the prevalence  
55  
56 235 of HDP and HTP smokers were mostly parallel to the general population in Japan.[2, 3, 14]  
57  
58 236 In addition, the incidence of HTP use did not differ between post-delivery and currently  
59  
60

1  
2  
3 237 pregnant women in our study. Second, recall and reporting bias cannot be discarded. Because  
4  
5 238 self-report-based smoking status among pregnant women tends to misclassify ever smokers  
6  
7  
8 239 as never smokers,[23] our estimates might be biased toward the null. Third, the perinatal  
9  
10 240 clinical information was self-reported and not based on medical charts, thereby limiting the  
11  
12 241 precision of the results. However, all participants were asked to base their responses on their  
13  
14 242 Maternal and Child Health Handbooks, a well-established home-base maternal and neonatal  
15  
16 243 record during pregnancy.[16] Therefore, this limitation might not have affected our results or  
17  
18 244 at least not largely. Despite these limitations, the strengths of the study included detailed  
19  
20 245 information for HTPs, which covered all HTPs available during the study period.  
21  
22 246 Additionally, this is the first report regarding the status of HTP use among pregnant women  
23  
24 247 in Japan, and it highlights the potentially elevated maternal and neonatal risks associated with  
25  
26 248 HTP use. Additionally, besides the present study, no other human studies to date have  
27  
28 249 assessed the potential effect of the maternal use of new tobacco products (i.e., e-cigarette and  
29  
30 250 HTP) on perinatal health.[24] Therefore, our findings shed light and motivate further  
31  
32 251 investigations to estimate the life-threatening perinatal risks associated with new tobacco  
33  
34 252 products.  
35  
36  
37  
38  
39

40 253 In conclusion, the incidence of HTP use seems to exceed 10% among pregnant women,  
41  
42 254 and HTP smoking may be associated with increased maternal and neonatal risks in Japan.  
43  
44 255 With no doubt, smoking in reproductive age can cause unfavorable perinatal outcomes.[25]  
45  
46 256 Hence, efforts should be made to investigate the risk of HTP use in reproductive age, and  
47  
48 257 school-based tobacco prevention and cessation programs should be conducted regardless of  
49  
50 258 product types to prevent life-threatening perinatal complications and deaths.  
51  
52  
53  
54  
55  
56  
57  
58  
59  
60

1  
2  
3 261 **Acknowledgments:** We would like to thank Editage (www.editage.com) for English  
4  
5 262 language editing.

6  
7 263 **Funding:** This study was partly supported by Health, Labour and Welfare Sciences Research  
8  
9 264 Grants (20FA1005) and the Japan Society for the Promotion of Science (JSPS KAKENHI  
10  
11 265 JP18K17351).

12  
13  
14 266 **Data availability statement:** The data that support the findings of this study are available on  
15  
16 267 reasonable request. However, restrictions apply to the availability of these data due to  
17  
18 268 personal identification; research data are not shared. If any person wishes to verify our data,  
19  
20 269 they are most welcome to contact the corresponding author.

21  
22  
23 270 **Conflict of interest:** The authors declare no potential conflicts of interest.

24  
25  
26 271 **Author contributions:** MZ and TT designed the study, and TT supervised the study. MZ,  
27  
28 272 YH, and SO developed the methodology, and SO, AH, and TT created the dataset. MZ and  
29  
30 273 YH analyzed the data and wrote the first draft of the manuscript. All authors revised the  
31  
32 274 manuscript and approved the final version.

33  
34  
35 275 **Ethics approval:** The study was approved by the Institutional Review Board of the Osaka  
36  
37 276 International Cancer Institute approved the study (Protocol Number 20084).

38  
39  
40 277

41  
42 278

43  
44  
45 279

280 **REFERENCES**

- 281 1 Tabuchi T, Gallus S, Shinozaki T, et al. Heat-not-burn tobacco product use in Japan: its  
282 prevalence, predictors and perceived symptoms from exposure to secondhand heat-not-  
283 burn tobacco aerosol. *Tob Control* 2018;27:e25–e33.
- 284 2 Hori A, Tabuchi T, Kunugita N. Rapid increase in heated tobacco product (HTP) use  
285 from 2015 to 2019: from the Japan “Society and New Tobacco” Internet Survey  
286 (JASTIS). *Tob Control* 2020.
- 287 3 Odani S, Tabuchi T. Prevalence of heated tobacco product use in Japan: the 2020 JASTIS  
288 study. *Tob Control* 2021. Doi: 10.1136/tobaccocontrol-2020-056257
- 289 4 Hair EC, Bennett M, Sheen E, et al. Examining perceptions about IQOS heated tobacco  
290 product: consumer studies in Japan and Switzerland. *Tob Control* 2018;27(Suppl 1):s70–  
291 3.
- 292 5 Nabavizadeh P, Liu J, Havel CM, et al. Vascular endothelial function is impaired by  
293 aerosol from a single IQOS HeatStick to the same extent as by cigarette smoke. *Tob*  
294 *Control* 2018;27(Suppl 1):s13–9.
- 295 6 Simonavicius E, McNeill A, Shahab L, et al. Heat-not-burn tobacco products: a  
296 systematic literature review. *Tob Control* 2019;28:582–94.
- 297 7 Duley L. The global impact of pre-eclampsia and eclampsia. *Semin Perinatol*  
298 2009;33:130–7.
- 299 8 Hasegawa J, Sekizawa A, Tanaka H, et al. Current status of pregnancy-related maternal  
300 mortality in Japan: a report from the Maternal Death Exploratory Committee in Japan.  
301 *BMJ Open* 2016;6:e010304.
- 302 9 England L, Zhang J. Smoking and risk of preeclampsia: a systematic review. *Front Biosci*  
303 2007;12:2471–83.



- 1  
2  
3 304 10 Hayashi K, Matsuda Y, Kawamichi Y, et al. Smoking during pregnancy increases risks of  
4  
5 305 various obstetric complications: a case-cohort study of the Japan Perinatal Registry  
6  
7 306 Network database. *J Epidemiol* 2011;21:61–6.
- 8  
9  
10 307 11 Tanaka K, Nishigori H, Watanabe Z, et al. Higher prevalence of hypertensive disorders of  
11  
12 308 pregnancy in women who smoke: the Japan environment and children’s study. *Hypertens*  
13  
14 309 *Res* 2019;42:558–66.
- 15  
16  
17 310 12 Rakuten Insight Inc. <https://insight.rakuten.co.jp/en/aboutus.html> (Accessed 11 Feb  
18  
19 311 2021).
- 20  
21  
22 312 13 Tabuchi T, Shinozaki T, Kunugita N, et al. Study profile: The Japan “Society and New  
23  
24 313 Tobacco” Internet Survey (JASTIS): A longitudinal internet cohort study of heat-not-burn  
25  
26 314 tobacco products, electronic cigarettes, and conventional tobacco products in Japan. *J*  
27  
28 315 *Epidemiol* 2019;29:444–50.
- 29  
30  
31 316 14. Umesawa M, Kobashi G. Epidemiology of hypertensive disorders in pregnancy:  
32  
33 317 prevalence, risk factors, predictors and prognosis. *Hypertens Res* 2017;40:213–20.
- 34  
35  
36 318 15 Fujimoto S, Nakamura Y, Ikeda M et al. Utilization of maternal and child health  
37  
38 319 handbook in Japan. *Nihon Koshu Eisei Zasshi* 2001;48:486–94.
- 39  
40 320 16 Osaki K, Hattori T, Toda A, et al. Maternal and Child Health Handbook use for maternal  
41  
42 321 and child care: a cluster randomized controlled study in rural Java, Indonesia. *J Public*  
43  
44 322 *Health (Oxf)* 2019;41:170–82.
- 45  
46  
47 323 17 Igarashi A, Aida J, Kusama T, et al. Heated tobacco products have reached younger or  
48  
49 324 more affluent people in Japan. *J Epidemiol* 2021;31:187–93.
- 50  
51  
52 325 18. Abraham M, Alramadhan S, Iniguez C, et al. A systematic review of maternal smoking  
53  
54 326 during pregnancy and fetal measurements with meta-analysis. *PLOS ONE*  
55  
56 327 2017;12:e0170946.
- 57  
58  
59  
60

- 1  
2  
3 328 19 Organization for Economic Cooperation and Development. OECD Family Database  
4  
5 [database on the Internet]. 2020.  
6 329  
7  
8 330 [https://www.oecd.org/els/family/CO\\_1\\_3\\_Low\\_birth\\_weight.pdf](https://www.oecd.org/els/family/CO_1_3_Low_birth_weight.pdf) (accessed 28 Feb 2021).  
9  
10 331 20 England LJ, Levine RJ, Mills JL, et al. Adverse pregnancy outcomes in snuff users. *Am J*  
11  
12 332 *Obstet Gynecol* 2003;189:939–43.  
13  
14 333 21 Nakajima M, Yamagishi S, Yamamoto H, et al. Deficient cotinine formation from  
15  
16 nicotine is attributed to the whole deletion of the CYP2A6 gene in humans. *Clin*  
17 334  
18 *Pharmacol Ther* 2000;67:57–69.  
19 335  
20 336 22 Yoshihara T, Zaito M, Kubota S, et al. Pool walking may improve renal function by  
21  
22 suppressing the renin-angiotensin-aldosterone system in healthy pregnant women. *Sci*  
23 337  
24 *Rep* 2020;10:2891.  
25 338  
26 339 23 Nishihama Y, Nakayama SF, Tabuchi T, et al. Determination of urinary cotinine cut-off  
27  
28 concentrations for pregnant women in the Japan environment and children's study  
29 340  
30 (JECS). *Int J Environ Res Public Health* 2020;17.  
31 341  
32 342 24 Larcombe AN. Early-life exposure to electronic cigarettes: cause for concern. *Lancet*  
33  
34 *Respir Med* 2019;7:985–992.  
35 343  
36 344 25 Atrash HK, Johnson K, Adams M, et al. Preconception care for improving perinatal  
37  
38 outcomes: the time to act. *Matern Child Health J* 2006;10(Suppl):S3–S11.  
39 345  
40 346  
41  
42  
43  
44  
45  
46  
47 347  
48  
49  
50  
51  
52  
53  
54  
55  
56  
57  
58  
59  
60

1  
2  
3 348 **FIGURE LEGEND**  
4

5 349 **Figure 1. Odds ratio of ever heated tobacco product smokers with hypertensive**  
6  
7 **disorders of pregnancy and low birth weight compared with never heated tobacco**  
8 350 **product smokers.** Age was adjusted in model 1, and other covariates (combustible cigarette  
9  
10 351 smoking, educational attainment, occupation, household income, and comorbidity) were  
11  
12 352 additionally adjusted in model 2. The samples for each analysis in model 2 were as follows:  
13  
14 353 n=494 (overall), n=370 (never combustible cigarette smokers), and n=124 (ever combustible  
15  
16 354 cigarette smokers) for hypertensive disorders of pregnancy; and n=478 (overall), n=310  
17  
18 355 (never combustible cigarette smokers), and n=118 (ever combustible cigarette smokers) for  
19  
20 356 low birth weight. Abbreviations: HTP, heated tobacco products; OR, odds ratio.  
21  
22  
23  
24  
25  
26  
27  
28  
29 359  
30  
31  
32  
33  
34  
35  
36  
37  
38  
39  
40  
41  
42  
43  
44  
45  
46  
47  
48  
49  
50  
51  
52  
53  
54  
55  
56  
57  
58  
59  
60

360 **Table 1. Characteristics of 558 post-delivery women and 365 currently pregnant women**

| Characteristics                         | N (%) or mean (SD)  |                  |                          |                  |
|-----------------------------------------|---------------------|------------------|--------------------------|------------------|
|                                         | Post-delivery women |                  | Currently pregnant women |                  |
|                                         | Never HTP smokers   | Ever HTP smokers | Never HTP smokers        | Ever HTP smokers |
| Overall                                 | <i>n</i> =493       | <i>n</i> =65     | <i>n</i> =319            | <i>n</i> =46     |
| Maternal and neonatal risk              |                     |                  |                          |                  |
| Hypertensive disorders of pregnancy     | 32 (6.5%)           | 9 (13.8%)*       | NA                       | NA               |
| Low birth weight <2500 g                | 44 (8.9%)           | 12 (18.5%)*      | NA                       | NA               |
| Preterm birth <37 weeks                 | 19 (3.9%)           | 4 (6.2%)         | NA                       | NA               |
| Imminent preterm birth                  | 82 (16.6%)          | 18 (27.7%)*      | NA                       | NA               |
| Age                                     | 32.4 (4.1)          | 30.9 (4.2)**     | 31.9 (4.3)               | 31.3 (4.7)       |
| Ever combustible cigarette smoking      | 82 (16.6%)          | 55 (84.6%***)    | 54 (16.9%)               | 41 (89.1%***)    |
| Educational attainment ≥13 years        | 410 (83.2%)         | 37 (56.9%***)    | 278 (87.1%)              | 31 (67.4%**)     |
| Managerial workers                      | 19 (3.9%)           | 5 (7.7%)         | 16 (5.0%)                | 2 (4.3%)         |
| Comorbidity of hypertension or diabetes | 35 (7.1%)           | 4 (6.2%)         | 4 (1.3%)                 | 4 (8.7%**)       |
| Household income                        |                     |                  |                          |                  |
| <200 million JPY                        | 13 (3.0%)           | 3 (5.2%)         | 6 (2.3%)                 | 1 (2.4%)         |
| 200 to <600 million JPY                 | 200 (45.9%)         | 30 (51.7%)       | 115 (43.7%)              | 19 (46.3%)       |
| ≥600 million JPY                        | 223 (51.1%)         | 25 (43.1%)       | 142 (54.0%)              | 21 (51.2%)       |
| Never combustible cigarette smokers     | <i>n</i> =411       | <i>n</i> =10     | <i>n</i> =265            | <i>n</i> =5      |
| Maternal and neonatal risk              |                     |                  |                          |                  |
| Hypertensive disorders of pregnancy     | 26 (6.3%)           | 1 (10.0%)        | NA                       | NA               |
| Low birth weight <2500 g                | 34 (8.3%)           | 3 (30.0%)*       | NA                       | NA               |
| Preterm birth <37 weeks                 | 17 (4.1%)           | 0 (0%)           | NA                       | NA               |
| Imminent preterm birth                  | 69 (16.8%)          | 3 (30.0%)        | NA                       | NA               |
| Age                                     | 32.2 (4.0)          | 33.3 (2.3)       | 31.7 (4.3)               | 30.2 (1.8)       |
| Educational attainment ≥13 years        | 348 (84.7%)         | 7 (70%)          | 235 (88.7%)              | 4 (80.0%)        |
| Managerial workers                      | 16 (3.9%)           | 1 (10%)          | 14 (5.3%)                | 0 (0%)           |

|                                         |               |               |               |              |
|-----------------------------------------|---------------|---------------|---------------|--------------|
| Comorbidity of hypertension or diabetes | 24 (5.8%)     | 0 (0%)        | 4 (1.5%)      | 0 (0%)       |
| Household income                        | <i>n</i> =361 | <i>n</i> =9   | <i>n</i> =219 | <i>n</i> =5  |
| <200 million JPY                        | 10 (2.8%)     | 0 (0%)        | 5 (2.3%)      | 0 (0%)       |
| 200 to <600 million JPY                 | 160 (44.3%)   | 4 (44.4%)     | 97 (44.3%)    | 3 (60.0%)    |
| ≥600 million JPY                        | 191 (52.9%)   | 5 (55.6%)     | 117 (53.45)   | 2 (40.0%)    |
| Ever combustible cigarette smokers      | <i>n</i> =82  | <i>n</i> =55  | <i>n</i> =54  | <i>n</i> =41 |
| Maternal and neonatal risk              |               |               |               |              |
| Hypertensive disorders of pregnancy     | 6 (7.3%)      | 8 (14.5%)     | NA            | NA           |
| Low birth weight <2500 g                | 10 (12.2%)    | 9 (16.4%)     | NA            | NA           |
| Preterm birth <37 weeks                 | 2 (2.4%)      | 4 (7.3%)      | NA            | NA           |
| Imminent preterm birth                  | 13 (15.9%)    | 15 (27.3%)    | NA            | NA           |
| Age                                     | 33.5 (4.3)    | 30.5 (4.3)*** | 32.9 (4.2)    | 31.4 (5.0)   |
| Educational attainment ≥13 years        | 62 (75.6%)    | 30 (54.5%)**  | 43 (79.6%)    | 27 (65.9%)   |
| Managerial workers                      | 3 (3.7%)      | 4 (7.3%)      | 2 (3.7%)      | 2 (4.9%)     |
| Comorbidity of hypertension or diabetes | 11 (13.4%)    | 4 (7.3%)      | 0 (0%)        | 4 (9.8%)*    |
| Household income                        | <i>n</i> =75  | <i>n</i> =49  | <i>n</i> =44  | <i>n</i> =36 |
| <200 million JPY                        | 3 (4.0%)      | 3 (6.1%)      | 1 (2.3%)      | 1 (2.8%)     |
| 200 to <600 million JPY                 | 40 (53.3%)    | 26 (53.1%)    | 18 (40.9%)    | 16 (44.4%)   |
| ≥600 million JPY                        | 32 (42.7%)    | 20 (40.8%)    | 25 (56.8%)    | 19 (52.8%)   |

361 Abbreviation: HTP, heated tobacco product; NA, not applicable.

362 \* $P < 0.05$ , \*\* $P < 0.01$ , \*\*\* $P < 0.001$  for chi-squared test or t-test.

363

364

365 **Table 2. Detailed smoking status and use of heated tobacco products cross-classified**  
 366 **according to combustible cigarette smoking status**

| Characteristics                         | HTP smoking status |            |           | Total      |
|-----------------------------------------|--------------------|------------|-----------|------------|
|                                         | Never              | Former     | Current   |            |
| Post-delivery women, <i>n</i> =558      |                    |            |           |            |
| Never combustible cigarette smokers     | 411 (97.6%)        | 9 (2.1%)   | 1 (0.2%)  | 421 (100%) |
| Former combustible cigarette smokers    | 79 (64.2%)         | 32 (26.0%) | 12 (9.8%) | 123 (100%) |
| Current combustible cigarette smokers   | 3 (21.4%)          | 9 (64.3%)  | 2 (14.3%) | 14 (100%)  |
| Currently pregnant women, <i>n</i> =365 |                    |            |           |            |
| Never combustible cigarette smokers     | 265 (98.1%)        | 5 (1.9%)   | 0 (0%)    | 270 (100%) |
| Former combustible cigarette smokers    | 54 (59.3%)         | 33 (36.3%) | 4 (4.4%)  | 91 (100%)  |
| Current combustible cigarette smokers   | 0 (0%)             | 4 (100%)   | 0 (0%)    | 4 (100%)   |

367 Abbreviation: HTP, heated tobacco product.

368 \**P*<0.05, \*\**P*<0.01, \*\*\**P*<0.001 for chi-squared test or t-test.

369

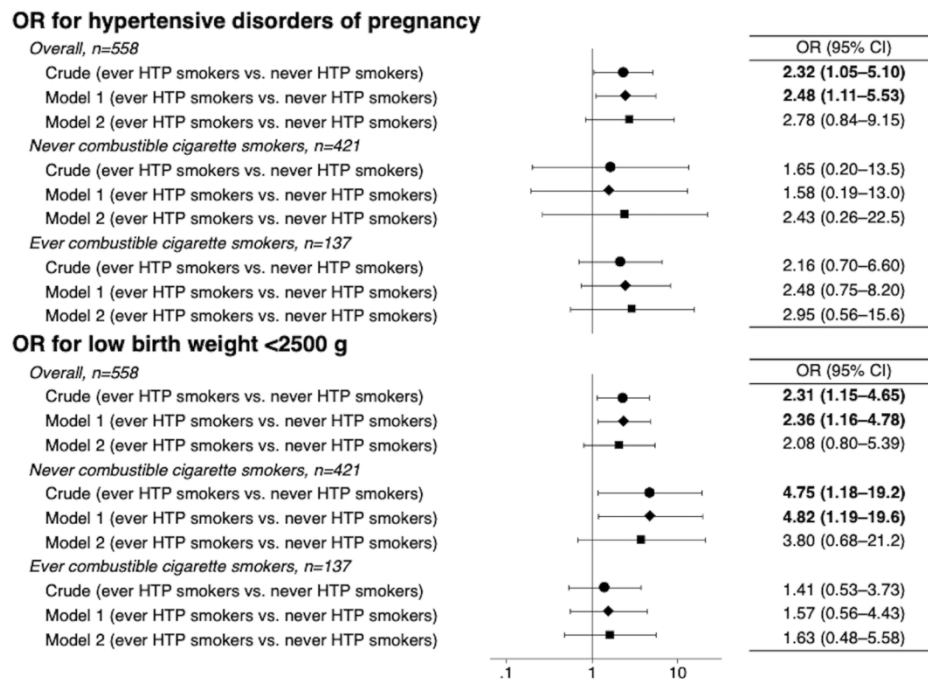

Figure 1. Odds ratio of ever heated tobacco product smokers with hypertensive disorders of pregnancy and low birth weight, compared with never heated tobacco product smokers. Age was adjusted in Model 1, and other covariates (combustible cigarette smoking, educational attainment, occupation, household income, and comorbidity) were additionally adjusted in Model 2. The samples for each analysis in Model 2 were as follows: n=494 (overall), n=370 (never combustible cigarette smokers), and n=124 (ever combustible cigarette smokers) for hypertensive disorders of pregnancy; and n=478 (overall), n=310 (never combustible cigarette smokers), and n=118 (ever combustible cigarette smokers) for low birth weight. Abbreviations: HTP, heated tobacco products; OR, Odds ratio.

139x99mm (300 x 300 DPI)

STROBE Statement—Checklist of items that should be included in reports of *cross-sectional studies*

|                           | <b>Item No</b> | <b>Recommendation</b>                                                                                                                                                                                                                                                                                                                                                                                                      |
|---------------------------|----------------|----------------------------------------------------------------------------------------------------------------------------------------------------------------------------------------------------------------------------------------------------------------------------------------------------------------------------------------------------------------------------------------------------------------------------|
| <b>Title and abstract</b> |                |                                                                                                                                                                                                                                                                                                                                                                                                                            |
| P1-4                      | 1              | (a) Indicate the study's design with a commonly used term in the title or the abstract<br>(b) Provide in the abstract an informative and balanced summary of what was done and what was found                                                                                                                                                                                                                              |
| <b>Introduction</b>       |                |                                                                                                                                                                                                                                                                                                                                                                                                                            |
| P5                        | 2              | Background/rationale Explain the scientific background and rationale for the investigation being reported                                                                                                                                                                                                                                                                                                                  |
| P5                        | 3              | Objectives State specific objectives, including any prespecified hypotheses                                                                                                                                                                                                                                                                                                                                                |
| <b>Methods</b>            |                |                                                                                                                                                                                                                                                                                                                                                                                                                            |
| P6                        | 4              | Study design Present key elements of study design early in the paper                                                                                                                                                                                                                                                                                                                                                       |
| P6                        | 5              | Setting Describe the setting, locations, and relevant dates, including periods of recruitment, exposure, follow-up, and data collection                                                                                                                                                                                                                                                                                    |
| P6                        | 6              | Participants (a) Give the eligibility criteria, and the sources and methods of selection of participants                                                                                                                                                                                                                                                                                                                   |
| P6-8                      | 7              | Variables Clearly define all outcomes, exposures, predictors, potential confounders, and effect modifiers. Give diagnostic criteria, if applicable                                                                                                                                                                                                                                                                         |
| P6-7                      | 8*             | Data sources/measurement For each variable of interest, give sources of data and details of methods of assessment (measurement). Describe comparability of assessment methods if there is more than one group                                                                                                                                                                                                              |
| P12                       | 9              | Bias Describe any efforts to address potential sources of bias                                                                                                                                                                                                                                                                                                                                                             |
| P6                        | 10             | Study size Explain how the study size was arrived at                                                                                                                                                                                                                                                                                                                                                                       |
| P7-8                      | 11             | Quantitative variables Explain how quantitative variables were handled in the analyses. If applicable, describe which groupings were chosen and why                                                                                                                                                                                                                                                                        |
| P8                        | 12             | Statistical methods (a) Describe all statistical methods, including those used to control for confounding<br>(b) Describe any methods used to examine subgroups and interactions<br>(c) Explain how missing data were addressed<br>(d) If applicable, describe analytical methods taking account of sampling strategy<br>(e) Describe any sensitivity analyses                                                             |
| <b>Results</b>            |                |                                                                                                                                                                                                                                                                                                                                                                                                                            |
| P8                        | 13*            | Participants (a) Report numbers of individuals at each stage of study—eg numbers potentially eligible, examined for eligibility, confirmed eligible, included in the study, completing follow-up, and analysed<br>(b) Give reasons for non-participation at each stage<br>(c) Consider use of a flow diagram                                                                                                               |
| P8-9                      | 14*            | Descriptive data (a) Give characteristics of study participants (eg demographic, clinical, social) and information on exposures and potential confounders<br>(b) Indicate number of participants with missing data for each variable of interest                                                                                                                                                                           |
| P8-9                      | 15*            | Outcome data Report numbers of outcome events or summary measures                                                                                                                                                                                                                                                                                                                                                          |
| P8-9                      | 16             | Main results (a) Give unadjusted estimates and, if applicable, confounder-adjusted estimates and their precision (eg, 95% confidence interval). Make clear which confounders were adjusted for and why they were included<br>(b) Report category boundaries when continuous variables were categorized<br>(c) If relevant, consider translating estimates of relative risk into absolute risk for a meaningful time period |
| P8-9                      | 17             | Other analyses Report other analyses done—eg analyses of subgroups and interactions, and sensitivity analyses                                                                                                                                                                                                                                                                                                              |



1  
2  
3  
4  
5  
6  
7  
8  
9  
10  
11  
12  
13  
14  
15  
16  
17  
18  
19  
20  
21  
22  
23  
24  
25  
26  
27  
28  
29  
30  
31  
32  
33  
34  
35  
36  
37  
38  
39  
40  
41  
42  
43  
44  
45  
46  
47  
48  
49  
50  
51  
52  
53  
54  
55  
56  
57  
58  
59  
60

---

**Discussion**

---

|                          |                  |    |                                                                                                                                                                            |
|--------------------------|------------------|----|----------------------------------------------------------------------------------------------------------------------------------------------------------------------------|
| P9-10                    | Key results      | 18 | Summarise key results with reference to study objectives                                                                                                                   |
| P11-12                   | Limitations      | 19 | Discuss limitations of the study, taking into account sources of potential bias or imprecision. Discuss both direction and magnitude of any potential bias                 |
| P9-10                    | Interpretation   | 20 | Give a cautious overall interpretation of results considering objectives, limitations, multiplicity of analyses, results from similar studies, and other relevant evidence |
| P12                      | Generalisability | 21 | Discuss the generalisability (external validity) of the study results                                                                                                      |
| <b>Other information</b> |                  |    |                                                                                                                                                                            |
| P12                      | Funding          | 22 | Give the source of funding and the role of the funders for the present study and, if applicable, for the original study on which the present article is based              |

\*Give information separately for exposed and unexposed groups.

**Note:** An Explanation and Elaboration article discusses each checklist item and gives methodological background and published examples of transparent reporting. The STROBE checklist is best used in conjunction with this article (freely available on the Web sites of PLoS Medicine at <http://www.plosmedicine.org/>, Annals of Internal Medicine at <http://www.annals.org/>, and Epidemiology at <http://www.epidem.com/>). Information on the STROBE Initiative is available at [www.strobe-statement.org](http://www.strobe-statement.org).

# BMJ Open

## Impact of heated tobacco product use and hypertensive disorders of pregnancy and low birth weight: Analysis of a web-based survey in Japan

|                                 |                                                                                                                                                                                                                                                                                                                                                                                                                                                                                                                                          |
|---------------------------------|------------------------------------------------------------------------------------------------------------------------------------------------------------------------------------------------------------------------------------------------------------------------------------------------------------------------------------------------------------------------------------------------------------------------------------------------------------------------------------------------------------------------------------------|
| Journal:                        | <i>BMJ Open</i>                                                                                                                                                                                                                                                                                                                                                                                                                                                                                                                          |
| Manuscript ID                   | bmjopen-2021-052976.R1                                                                                                                                                                                                                                                                                                                                                                                                                                                                                                                   |
| Article Type:                   | Original research                                                                                                                                                                                                                                                                                                                                                                                                                                                                                                                        |
| Date Submitted by the Author:   | 11-Jul-2021                                                                                                                                                                                                                                                                                                                                                                                                                                                                                                                              |
| Complete List of Authors:       | Zaitso, Masayoshi ; Dokkyo Medical University, Department of Public Health<br>Hosokawa, Yoshihiko; Dokkyo Medical University, Department of Public Health; University of Tsukuba, Department of Obstetrics and Gynecology<br>Okawa, Sumiyo; Osaka Medical Center for Cancer and Cardiovascular Diseases<br>Hori, Ai; University of Tsukuba, Department of Global Public Health<br>Kobashi, Gen; Dokkyo Medical University, Department of Public Health<br>Tabuchi, Takahiro; Osaka Medical Center for Cancer and Cardiovascular Diseases |
| <b>Primary Subject Heading</b>: | Public health                                                                                                                                                                                                                                                                                                                                                                                                                                                                                                                            |
| Secondary Subject Heading:      | Respiratory medicine, Reproductive medicine                                                                                                                                                                                                                                                                                                                                                                                                                                                                                              |
| Keywords:                       | COVID-19, Fetal medicine < OBSTETRICS, Maternal medicine < OBSTETRICS, PUBLIC HEALTH, TOXICOLOGY, Epidemiology < THORACIC MEDICINE                                                                                                                                                                                                                                                                                                                                                                                                       |
|                                 |                                                                                                                                                                                                                                                                                                                                                                                                                                                                                                                                          |

SCHOLARONE™  
Manuscripts

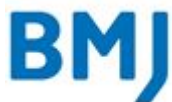

I, the Submitting Author has the right to grant and does grant on behalf of all authors of the Work (as defined in the below author licence), an exclusive licence and/or a non-exclusive licence for contributions from authors who are: i) UK Crown employees; ii) where BMJ has agreed a CC-BY licence shall apply, and/or iii) in accordance with the terms applicable for US Federal Government officers or employees acting as part of their official duties; on a worldwide, perpetual, irrevocable, royalty-free basis to BMJ Publishing Group Ltd ("BMJ") its licensees and where the relevant Journal is co-owned by BMJ to the co-owners of the Journal, to publish the Work in this journal and any other BMJ products and to exploit all rights, as set out in our [licence](#).

The Submitting Author accepts and understands that any supply made under these terms is made by BMJ to the Submitting Author unless you are acting as an employee on behalf of your employer or a postgraduate student of an affiliated institution which is paying any applicable article publishing charge ("APC") for Open Access articles. Where the Submitting Author wishes to make the Work available on an Open Access basis (and intends to pay the relevant APC), the terms of reuse of such Open Access shall be governed by a Creative Commons licence – details of these licences and which [Creative Commons](#) licence will apply to this Work are set out in our licence referred to above.

Other than as permitted in any relevant BMJ Author's Self Archiving Policies, I confirm this Work has not been accepted for publication elsewhere, is not being considered for publication elsewhere and does not duplicate material already published. I confirm all authors consent to publication of this Work and authorise the granting of this licence.

1  
2  
3 1 **Impact of heated tobacco product use and hypertensive disorders of pregnancy and low**  
4  
5 2 **birth weight: Analysis of a web-based survey in Japan**  
6  
7  
8 3  
9

10 4 Masayoshi Zaitu,<sup>1,\*</sup> Yoshihiko Hosokawa,<sup>1,2,\*</sup> Sumiyo Okawa,<sup>3</sup> Ai Hori,<sup>4</sup> Gen Kobashi,<sup>1</sup>  
11  
12 5 Takahiro Tabuchi<sup>3</sup>  
13  
14  
15 6

16  
17 7 <sup>1</sup> Department of Public Health, School of Medicine, Dokkyo Medical University, Tochigi,  
18  
19 8 Japan

20  
21 9 <sup>2</sup> Department of Obstetrics and Gynecology, Faculty of Medicine, University of Tsukuba,  
22  
23 10 Ibaraki, Japan

24  
25  
26 11 <sup>3</sup> Cancer Control Center, Osaka Medical Center for Cancer and Cardiovascular Diseases,  
27  
28 12 Osaka, Japan

29  
30 13 <sup>4</sup> Department of Global Public Health, University of Tsukuba, Tsukuba, Ibaraki, Japan

31  
32  
33 14 \* These authors contributed equally to this work.  
34  
35  
36 15

37  
38 16 **Corresponding author:** Masayoshi Zaitu, MD, PhD

39  
40 17 Department of Public Health, School of Medicine, Dokkyo Medical University

41  
42 18 880 Kitakobayashi, Mibu, Shimotsuga-gun, Tochigi, 321-0293 Japan

43  
44 19 Tel: +81-282-87-2133; Fax: +81-282-86-2935

45  
46 20 Email: m-zaitu@dokkyomed.ac.jp

47  
48  
49 21 ORCID: [orcid.org/0000-0001-7616-355X](https://orcid.org/0000-0001-7616-355X)  
50  
51 22

52  
53 23 **Word count:** 2540 words  
54  
55  
56  
57  
58  
59  
60

1  
2  
3 24 **ABSTRACT**  
4

5 25 **Objectives:** Knowledge on the impact of heated tobacco product (HTP) use in pregnant  
6  
7  
8 26 women with associated maternal and neonatal risks for hypertensive disorders of pregnancy  
9  
10 27 (HDP) and low birth weight (LBW) is limited. We aimed to assess the status of HTP use  
11  
12 28 among pregnant women in Japan and explore the association of HTP use with HDP and  
13  
14 29 LBW.  
15

16  
17 30 **Design:** cross-sectional study  
18

19 31 **Setting:** Data from the Japan “COVID-19 and Society” Internet Survey study, a web-based  
20  
21 32 nationwide survey  
22  
23

24 33 **Participants:** We investigated 558 post-delivery and 365 currently pregnant women in  
25  
26 34 October 2020.  
27

28 35 **Primary and secondary outcome measures:** Information on HDP and LBW was collected  
29  
30 36 from the post-delivery women’s Maternal and Child Health Handbooks (maternal and  
31  
32 37 newborn records). We estimated the age-adjusted odds ratios (ORs) and 95% confidence  
33  
34 38 intervals (CIs) of ever HTP smokers for HDP and LBW and compared them with those of  
35  
36 39 never HTP smokers in a logistic regression analysis.  
37  
38

39 40 **Results:** The prevalence of ever and current HTP use were 11.7% and 2.7% in post-delivery  
41  
42 41 women and 12.6% and 1.1% in currently pregnant women, respectively. Among currently  
43  
44 42 pregnant women who were former combustible cigarette smokers, 4.4% (4/91) were current  
45  
46 43 HTP smokers. Among post-delivery women, ever HTP smokers had a higher HDP incidence  
47  
48 44 (13.8% vs. 6.5%,  $P=0.03$ ; age-adjusted OR=2.48, 95% CI 1.11–5.53) and higher LBW  
49  
50 45 incidence (18.5% versus 8.9%,  $P=0.02$ ; age-adjusted OR=2.36, 95% CI 1.16–4.87).  
51  
52

53 46 **Conclusions:** In Japan, the incidence of ever HTP use exceeded 10% among pregnant  
54  
55 47 women, and HTP smoking may be associated with maternal and neonatal risks.  
56  
57  
58  
59  
60

1  
2  
3 49 **Keywords:** heated tobacco products, hypertensive disorders of pregnancy, COVID-19,  
4  
5  
6 50 smoking, preconception  
7  
8  
9

10 52 **Strengths and limitations of this study:**

- 11  
12 53 ● This study covered all heated tobacco products (HTPs) available during the study period.  
13  
14 54 ● All participants were asked to base their responses on information in their Maternal and  
15  
16  
17 55 Child Health Handbooks, a well-established home-based maternal and neonatal record of  
18  
19 56 pregnancy.  
20  
21 57 ● The web-based, self-reported cross-sectional design with a small sample size was a  
22  
23  
24 58 source of bias, and causal mechanisms were not examined.  
25  
26 59 ● The lack of information on HTP smoking during pregnancy limited the assessment of the  
27  
28  
29 60 direct impact of HTP use on pregnancy outcomes.  
30  
31 61 ● The participants' relevant medical histories were not assessed.  
32  
33  
34  
35  
36  
37  
38  
39  
40  
41  
42  
43  
44  
45  
46  
47  
48  
49  
50  
51  
52  
53  
54  
55  
56  
57  
58  
59  
60

## 63 INTRODUCTION

64 The use of heated tobacco products (HTPs) is an emerging public health concern.[1] Since  
65 the initial marketing of HTPs in 2014, the prevalence of HTP use has increased in Japan, with  
66 a registered prevalence above 15% in the young population aged 20–39 years in 2019.[2]  
67 This prevalence remained above 15% during the coronavirus disease (COVID-19) pandemic  
68 in 2020.[3] The use of HTPs is increasing worldwide, particularly in the younger population;  
69 the prevalence of HTP use among Guatemala adolescents was 2.9% in 2020.[4]

70 Although the advertisement of HTPs (e.g., reduced harmfulness and a smoke-free  
71 image) promotes the impression that HTPs are healthy alternatives to combustible  
72 cigarettes,[5] HTP-related unfavorable health outcomes, including acute respiratory and  
73 cardiovascular risks, are likely to occur.[6, 7] However, existing knowledge on HTP use and  
74 its association with maternal and neonatal risks in pregnant women is limited. The two  
75 commonest life-threatening maternal and neonatal risks are hypertensive disorders of  
76 pregnancy (HDP) and low birth weight (LBW).[8, 9] Although there are controversial reports  
77 on the association between HDP and combustible cigarette use,[10] combustible cigarettes  
78 are known to increase various maternal and neonatal risks in Japan.[11, 12] Therefore, in this  
79 study, we focused on the association of HTP use with HDP and LBW, which are partly linked  
80 to other perinatal risks such as preterm birth.

81 This study aimed to assess the status of HTP use among pregnant women in Japan and  
82 explore HTP-associated perinatal risks, in particular the risk of HDP and LBW, by analyzing  
83 data from a nationwide web-based survey in Japan that contained information on pregnancy,  
84 behavioral factors (e.g., HTP use and combustible cigarette smoking), and social background.

## 87 MATERIALS AND METHODS

## 88 **Study design, data setting, and participants**

89 This cross-sectional internet-based study is part of the Japan COVID-19 and Society Internet  
90 Survey (JACSIS) study. The JACSIS study comprises three surveys in the following three  
91 target populations: (a) young people and adults aged 15–79 years, (b) currently pregnant and  
92 post-delivery women, and (c) adults living in a single-parent household. The study samples  
93 for each survey were retrieved from the pooled panels of an internet research agency  
94 (Rakuten Insight, Inc., which had approximately 2.2 million panelists in 2019).[13] We used  
95 data from currently pregnant and post-delivery women, which were collected in October  
96 2020.

97 The internet research agency initially identified 21,896 eligible women who gave birth  
98 after October 2019 or who were expected to give birth by March 2021; however, our target  
99 sample size was 1,000 women due to the available study budget. Using a computer algorithm,  
100 the internet research agency randomly selected 4373 women to reach the target sample size of  
101 1000. Quality control methods for the sampling of panelists and other policies for panelists  
102 by the internet research agency have been described elsewhere.[14] An invitation e-mail was  
103 sent to the selected 4373 women; they were to complete the questionnaire through a  
104 designated website containing the survey questionnaire (made up of 61 questions, one  
105 question per page). Data collection started on October 15, 2020, and ended on October 25,  
106 2020, when the target sample size of 1000 by natural course (response rate, 22.9%) was met.  
107 Next, we obtained de-identified data from 1000 women from the internet research agency,  
108 and the study population was stratified by delivery date as follows: (a) 600 post-delivery  
109 women who delivered in October 2019–October 2020 (the number for October 2019–March  
110 2020, April–May 2020, and June–October 2020 was 200 each) and (b) 400 currently  
111 pregnant women who were expected to deliver in October 2020–March 2021.



1  
2  
3 112 Seventy-seven (42 post-delivery and 35 currently pregnant women) participants who  
4  
5 113 provided irrelevant or conflicting information were excluded, like it was done in previous  
6  
7 114 studies of the same research agency.[15] A total of 923 (558 post-delivery and 365 currently  
8  
9 115 pregnant women) participants were included in the analysis. Informed consent was obtained  
10  
11 116 electronically before the study participants answered the web-based questionnaire, and the  
12  
13 117 Institutional Review Board of the Osaka International Cancer Institute approved the study  
14  
15 118 (Protocol Number 20084).  
16  
17  
18  
19  
20  
21

### 22 120 **Definition of HDP and LBW**

23  
24 121 Data on HDP and LBW were extracted from the web-based self-reported  
25  
26 122 questionnaires. The incidence of HDP was based on whether the study participants had been  
27  
28 123 diagnosed with HDP or preeclampsia during pregnancy. The criteria for HDP diagnosis in  
29  
30 124 Japan were derived from the criteria of the American College of Obstetricians and  
31  
32 125 Gynecologists (i.e., systolic blood pressure  $\geq 140$  mmHg or diastolic blood pressure  $\geq 90$   
33  
34 126 mmHg after the 20th week of gestation).[16] The incidence of LBW was defined on the basis  
35  
36 127 of the diagnosis of LBW (birth weight  $< 2500$  g). All municipalities issue a handbook to all  
37  
38 128 pregnant women in which medical professionals record the health information of the mother  
39  
40 129 and child, including clinical outcomes (e.g., blood pressure and birth weight) and incident  
41  
42 130 diagnoses (e.g., HDP and LBW) during pregnancy; this is part of a national maternal and  
43  
44 131 child health policy. Mothers seldom lose their Maternal and Child Health Handbooks (losing  
45  
46 132 rate,  $< 1\%$ ).[17]  
47  
48  
49  
50

51 133 All participants were asked to provide information from their Maternal and Child  
52  
53 134 Health Handbooks. Although the definitions of HDP and LBW were based on diagnosis only  
54  
55 135 (treatment information was not obtained), the information was reliable, since Maternal and  
56  
57  
58  
59  
60

1  
2  
3 136 Child Health Handbooks are well-established integrated home-based records of maternal,  
4  
5 137 newborn, and child health.[17, 18]  
6  
7  
8 138

9  
10 139 **HTP and cigarette smoking and other covariates**

11  
12 140 In the questionnaire, study participants were asked to indicate their smoking status (never,  
13  
14 141 once or a few times [trial smoking and not habitual], former, sometimes [habitual], or every  
15  
16 142 day) for each HTP that was available in the study period (Ploom Tech, Ploom Tech plus,  
17  
18 143 Ploom S, IQOS, glo, glo sens, and PULZE). Participants who answered “never” for all HTPs  
19  
20 144 were considered as never HTP smokers; the remaining participants were considered as ever  
21  
22 145 HTP smokers. Therefore, the ever HTP smoking group included those who used HTPs before  
23  
24 146 pregnancy and during pregnancy altogether. We could not specifically distinguish the impacts  
25  
26 147 of HTP smoking during pregnancy from that of HTP smoking before pregnancy.  
27  
28  
29

30  
31 148 The status of combustible cigarette smoking was classified as never smoker and ever  
32  
33 149 smoker. It was impossible to further classify the smokers into former or dual smokers due to  
34  
35 150 the nature of the study. The other covariates included age, educational attainment ( $\leq 12$  years  
36  
37 151 [high school] or  $\geq 13$  years [college or university]), occupation (manager or others),  
38  
39 152 household income ( $< 2$  million JPY [approximately 20,000 USD], 2 to  $< 6$  million JPY, and  $\geq 6$   
40  
41 153 million JPY), and comorbidity (having hypertension or diabetes).[19]  
42  
43  
44  
45 154

46  
47 155 **Statistical analysis**

48  
49 156 Descriptive statistics were computed and compared using the t-test or chi-squared test. The  
50  
51 157 prevalence of ever HTP smokers was assessed among the post-delivery and currently  
52  
53 158 pregnant women. Additionally, the HTP smoking status was cross-classified according to the  
54  
55 159 combustible cigarette smoking status of the currently pregnant and post-delivery women.  
56  
57  
58  
59  
60

1  
2  
3 160 To assess the potential association between HTP smoking and perinatal risk of HDP  
4  
5 161 and LBW, the sample was reduced to 558 post-delivery women who could complete all the  
6  
7  
8 162 assessments during their pregnancy (Table 1). In the multivariable logistic regression  
9  
10 163 analyses, the odds ratio (OR) and 95% confidence interval (CI) of ever HTP smokers for  
11  
12 164 HDP risk were estimated after adjustment for age (Model 1, the main model in this study).  
13  
14 165 The never HTP smokers comprised the reference group. In Model 2, full adjustments for  
15  
16 166 other explanatory variables (combustible cigarette smoking, educational attainment,  
17  
18 167 occupation, household income, and comorbidity) were performed, and 64 participants with  
19  
20 168 missing information on household income were excluded. The same analyses were performed  
21  
22 169 for LBW.

23  
24  
25  
26 170 For the sensitivity analysis, a stratified analysis with respect to combustible cigarette  
27  
28 171 smoking (never/ever) was performed. In addition, using a different reference group that  
29  
30 172 included those who never smoked any form of tobacco (HTPs and combustible cigarettes),  
31  
32 173 the ORs of ever HTP smokers for HDP and LBW risks were estimated.

33  
34  
35 174 Alpha was set at 0.05, and all *P* values were two sided. Data were analyzed using  
36  
37 175 STATA/MP13.1 (StataCorp LLC, College Station, TX).

#### 38 176 39 40 41 42 177 **Patient and Public Involvement**

43  
44 178 Neither patients nor the public was involved.  
45  
46  
47 179  
48  
49 180

## 50 51 181 **RESULTS**

52  
53 182 Among 558 post-delivery women, the incidences of HDP and LBW were 7.3% (n=41) and  
54  
55 183 10.0% (n=56), respectively, and the prevalence of ever HTP smokers was 11.7% (n=65,  
56  
57  
58 184 Table 1). Furthermore, among the 365 currently pregnant women, the prevalence of ever HTP  
59  
60

1  
2  
3 185 smokers was 12.6% (n=46), which did not differ from that of HTP smokers among post-  
4  
5 186 delivery women ( $P=0.66$ ).  
6

7  
8 187 Among the currently pregnant women, 4.4% (4/91 participants) of the former  
9  
10 188 combustible cigarette smokers reported smoking HTPs during pregnancy (Table 2),  
11  
12 189 corresponding to 1.1% (4/365 participants) of currently pregnant women. In addition, 36.3%  
13  
14 190 (33/91 participants) of former combustible cigarette smokers quit HTP smoking during  
15  
16 191 pregnancy, corresponding to 11.5% (42/365 participants) of currently pregnant women.  
17  
18

19 192 Among the post-delivery women, the HDP incidence was higher in ever HTP smokers  
20  
21 193 than in never HTP smokers (13.8% [n=9] vs. 6.5% [n=35],  $P=0.03$ ; Table 1). Similarly, the  
22  
23 194 incidence of LBW was higher among ever HTP smokers than among never HTP smokers  
24  
25 195 (18.5% [n=12] vs. 8.9% [n=44],  $P=0.02$ ; Table 1). When stratified by combustible cigarette  
26  
27 196 smoking, a similar pattern was observed among never and ever combustible cigarette  
28  
29 197 smokers (Table 1).  
30  
31

32  
33 198 In the regression analysis, the age-adjusted ORs for HDP and LBW were elevated in  
34  
35 199 ever HTP smokers (Model 1); the ORs for HDP and LBW were 2.48 (95% CI, 1.11–5.53)  
36  
37 200 and 2.36 (95% CI, 1.16–4.78), respectively. However, the elevated ORs were not significant  
38  
39 201 after adjusting for other covariates (Model 2, Figure 1). In the same regression analyses  
40  
41 202 (Model 2), while ever combustible cigarette smokers were not associated with perinatal  
42  
43 203 outcomes, the ORs of managerial workers for HDP and LBW were 3.92 (95% CI 1.16–13.2)  
44  
45 204 and 3.74 (95% CI 1.41–9.93), respectively.  
46  
47  
48

49 205 In the sensitivity analyses, when stratified by combustible cigarette smoking, a similar  
50  
51 206 pattern was observed independently in never and ever combustible cigarette smokers (Figure  
52  
53 207 1). For instance, among never combustible cigarette smokers, the age-adjusted OR of HTP  
54  
55 208 use for LBW was 4.82 (95% CI, 1.19–19.6). A further analysis comparing 65 ever HTP  
56  
57 209 smokers in the post-delivery group and 411 never tobacco smokers showed similar results:  
58  
59  
60

1  
2  
3 210 compared with those who never smoked any form of tobacco, the age-adjusted ORs of ever  
4  
5 211 HTP smokers for HDP and LBW were 2.56 (95% CI 1.13–5.80) and 2.52 (95% CI 1.22–  
6  
7 212 5.20), respectively (Model 1). However, after adjusting for other covariates (Model 2), the  
8  
9 213 ORs were not significant due to the small sample size: the ORs for HDP and LBW were 2.40  
10  
11 214 (95% CI 0.27–21.2) and 3.59 (95% CI 0.66–19.5), respectively.  
12  
13  
14  
15 215  
16  
17 216

## 19 217 **DISCUSSION**

21 218 During the first wave of the COVID-19 pandemic in Japan, the incidence of HTP use among  
22  
23 219 pregnant women exceeded 10%, and there was a suspected association of HTP use and  
24  
25 220 perinatal risk of HDP and LBW. However, after adjusting for potential explanatory factors,  
26  
27 221 there was no significant association, which may be due to the weak statistical power because  
28  
29 222 of the small sample size.  
30  
31

32  
33 223 To the best of our knowledge, this is the first report of a potential association between  
34  
35 224 HTP use and perinatal risks. Although smoking plays a controversial role,[10] recent  
36  
37 225 evidence suggests that combustible cigarette smoking is associated with increased HDP  
38  
39 226 risk.[11, 12] Although the biological and genetic pathways (e.g., CYP2A6 and nicotine)  
40  
41 227 underlying the associations observed in different phenotypes of HDP (e.g., preeclampsia and  
42  
43 228 gestational hypertension) have not been elucidated,[20] HDP is recognized as a systemic  
44  
45 229 disease attributable to placental circulatory dysfunction.[21] In experimental research, aerosol  
46  
47 230 from HTPs was found to damage vascular endothelial function in rats.[6] Therefore, the  
48  
49 231 association between HDP risk and HTP use may involve acute and chronic vascular damage,  
50  
51 232 irrespective of combustible cigarette smoking. Furthermore, as concluded in a recent  
52  
53 233 systematic review, smoking is a strong risk factor for LBW.[22] Thus, given the fact that  
54  
55 234 HTPs are smoking devices, our observed results are in line with established reports.  
56  
57  
58  
59  
60

1  
2  
3 235 Although HTP-related unfavorable health outcomes (e.g., acute respiratory and  
4  
5  
6 236 cardiovascular risks) are likely to occur,[6, 7] the impression of HTPs as a healthy alternative  
7  
8 237 is promoted by HTP use advertisements.[5] The Japanese HTP market share accounted for  
9  
10 238 21% of total tobacco sales in 2018, and the weak restrictions on tobacco advertisements and  
11  
12 239 promotion in this country contribute to increased HTP use.[23] Among currently pregnant  
13  
14 240 women, approximately 4% of former combustible cigarette smokers reported smoking HTPs  
15  
16 241 in the present study. This result might explain the change from combustible cigarettes to HTP  
17  
18 242 smoking during pregnancy. In a setting of weak tobacco restrictions such as Guatemala, even  
19  
20 243 though the prevalence of HTP use is low (2.9%) among adolescents, a high prevalence is  
21  
22 244 anticipated.[4] However, our findings imply that HTP use is not a healthy alternative.  
23  
24 245 Evidence for unfavorable HTP-related health outcomes is still insufficient, particularly  
25  
26 246 among reproductive age women. In addition, the impact of multidimensional factors of the  
27  
28 247 COVID-19 pandemic (e.g., the infection, mental health, and socioeconomic factors) and the  
29  
30 248 smoking behaviors of others (e.g., partners and family) on the association between HTP use  
31  
32 249 and perinatal risks remains unknown. The ongoing JACSIS study may provide updates in this  
33  
34 250 regard.

35  
36  
37  
38  
39 251 Our study has limitations. First, this was a web-based, self-reported cross-sectional  
40  
41 252 study with a small sample size, which may be a source of bias and a limitation to explaining  
42  
43 253 the causal mechanisms between HTP use and perinatal risks. Due to the lack of information  
44  
45 254 on HTP smoking during pregnancy, the direct impact of HTP smoking on pregnancy  
46  
47 255 outcomes could not be assessed. Furthermore, details on the participants' medical histories  
48  
49 256 including relevant comorbidities, and detailed smoking information such as smoking intensity  
50  
51 257 and duration of smoking abstinence were not available. In addition, electronic cigarette use  
52  
53 258 was not assessed. However, the prevalences of HDP and HTP smokers were mostly parallel  
54  
55 259 to the general population in Japan.[2, 3, 16] The incidence of HTP use did not differ between  
56  
57  
58  
59  
60

1  
2  
3 260 post-delivery and currently pregnant women in our study. Second, recall and reporting bias of  
4  
5 261 HTP use could not be discarded, as suggested in a study on combustible cigarette and  
6  
7  
8 262 electronic cigarette smoking.[4] Because self-report-based smoking status among pregnant  
9  
10 263 women tends to misclassify ever smokers as never smokers,[24] our estimates might be  
11  
12 264 biased toward the null. Third, the perinatal clinical information was self-reported and not  
13  
14 265 based on medical charts, thereby limiting the precision of the results. However, all  
15  
16 266 participants were asked to base their responses on information in their Maternal and Child  
17  
18 267 Health Handbooks, a well-established home-based maternal and neonatal record during  
19  
20 268 pregnancy.[18] Therefore, this limitation might not have affected our results, or at least not  
21  
22 269 largely. Despite these limitations, all HTPs that were available during the study period were  
23  
24 270 assessed. This is the first report on the status of HTP use among pregnant women in Japan,  
25  
26 271 and it highlights the potentially elevated maternal and neonatal risks associated with HTP  
27  
28 272 use. Additionally, to date, besides the present study, no other human studies have assessed the  
29  
30 273 potential effect of the maternal use of new tobacco products (i.e., e-cigarettes and HTPs) on  
31  
32 274 perinatal health.[25] Therefore, our findings shed light and motivate further investigations to  
33  
34 275 assess the life-threatening perinatal risks associated with new tobacco products.  
35  
36  
37  
38  
39

40 276 In conclusion, the incidence of HTP use seems to exceed 10% among pregnant women,  
41  
42 277 and HTP smoking may be associated with increased maternal and neonatal risks in Japan.  
43  
44 278 Undoubtedly, smoking in reproductive age women can cause unfavorable perinatal  
45  
46 279 outcomes.[26] Hence, efforts should be made to investigate the risk of HTP use in  
47  
48 280 reproductive age women, to prevent life-threatening perinatal complications and deaths.  
49  
50

51 281

52 282

53  
54  
55  
56 283 **Acknowledgments:** We would like to thank Editage ([www.editage.com](http://www.editage.com)) for English  
57  
58 284 language editing.  
59  
60

1  
2  
3 285 **Funding:** This study was partly supported by Health, Labour and Welfare Sciences Research  
4  
5 286 Grants (20FA1005) and the Japan Society for the Promotion of Science (JSPS KAKENHI  
6  
7 287 JP18K17351).  
8  
9

10 288 **Data availability statement:** The data that support the findings of this study are available on  
11  
12 289 reasonable request. However, restrictions apply to the availability of these data due to  
13  
14 290 personal identification; research data are not shared. If any person wishes to verify our data,  
15  
16 291 they are most welcome to contact the corresponding author.  
17  
18

19 292 **Conflict of interest:** The authors declare no potential conflicts of interest.  
20

21 293 **Author contributions:** MZ and TT designed the study. TT supervised the study. MZ, YH,  
22  
23 294 and SO developed the methodology. SO, AH, and TT created the dataset. MZ and YH  
24  
25 295 analyzed the data. MZ and YH wrote the first draft of the manuscript. SO, AH, GK, and TT  
26  
27 296 commented on the manuscript. All authors read and approved the final version.  
28  
29

30 297 **Ethics approval:** The study was approved by the Institutional Review Board of the Osaka  
31  
32 298 International Cancer Institute approved the study (Protocol Number 20084).  
33  
34

35 299

36  
37  
38 300

39  
40 301  
41  
42  
43  
44  
45  
46  
47  
48  
49  
50  
51  
52  
53  
54  
55  
56  
57  
58  
59  
60



302 **REFERENCES**

- 303 1 Tabuchi T, Gallus S, Shinozaki T, et al. Heat-not-burn tobacco product use in Japan: its  
304 prevalence, predictors and perceived symptoms from exposure to secondhand heat-not-  
305 burn tobacco aerosol. *Tob Control* 2018;27:e25–e33.
- 306 2 Hori A, Tabuchi T, Kunugita N. Rapid increase in heated tobacco product (HTP) use  
307 from 2015 to 2019: from the Japan “Society and New Tobacco” Internet Survey  
308 (JASTIS). *Tob Control* [Epub ahead of print]. June 05, 2020 [cited 2021 July 08]  
309 [https://doi: 10.1136/tobaccocontrol-2020-055652](https://doi.org/10.1136/tobaccocontrol-2020-055652).
- 310 3 Odani S, Tabuchi T. Prevalence of heated tobacco product use in Japan: the 2020 JASTIS  
311 study. *Tob Control* [Epub ahead of print]. March 11, 2021 [cited 2021 July 08]  
312 [https://doi: 10.1136/tobaccocontrol-2020-056257](https://doi.org/10.1136/tobaccocontrol-2020-056257).
- 313 4 Gottschlich A, Mus S, Monzon JC, et al. Cross-sectional study on the awareness,  
314 susceptibility and use of heated tobacco products among adolescents in Guatemala City,  
315 Guatemala. *BMJ Open*. 2020;10:e039792.
- 316 5 Hair EC, Bennett M, Sheen E, et al. Examining perceptions about IQOS heated tobacco  
317 product: consumer studies in Japan and Switzerland. *Tob Control* 2018;27(Suppl 1):s70–  
318 3.
- 319 6 Nabavizadeh P, Liu J, Havel CM, et al. Vascular endothelial function is impaired by  
320 aerosol from a single IQOS HeatStick to the same extent as by cigarette smoke. *Tob*  
321 *Control* 2018;27(Suppl 1):s13–9.
- 322 7 Simonavicius E, McNeill A, Shahab L, et al. Heat-not-burn tobacco products: a  
323 systematic literature review. *Tob Control* 2019;28:582–94.
- 324 8 Duley L. The global impact of pre-eclampsia and eclampsia. *Semin Perinatol*  
325 2009;33:130–7.

- 1  
2  
3 326 9 Hasegawa J, Sekizawa A, Tanaka H, et al. Current status of pregnancy-related maternal  
4 mortality in Japan: a report from the Maternal Death Exploratory Committee in Japan.  
5  
6 327  
7  
8 328 *BMJ Open* 2016;6:e010304.  
9
- 10 329 10 England L, Zhang J. Smoking and risk of preeclampsia: a systematic review. *Front Biosci*  
11  
12 330 2007;12:2471–83.  
13
- 14 331 11 Hayashi K, Matsuda Y, Kawamichi Y, et al. Smoking during pregnancy increases risks of  
15 various obstetric complications: a case-cohort study of the Japan Perinatal Registry  
16  
17 332  
18 Network database. *J Epidemiol* 2011;21:61–6.  
19 333
- 20 334 12 Tanaka K, Nishigori H, Watanabe Z, et al. Higher prevalence of hypertensive disorders of  
21 pregnancy in women who smoke: the Japan environment and children’s study. *Hypertens*  
22  
23 335  
24  
25 336 *Res* 2019;42:558–66.  
26  
27
- 28 337 13 Rakuten Insight Inc. <https://insight.rakuten.co.jp/en/aboutus.html> (accessed 26 Jun 2021).  
29
- 30 338 14 Rakuten Insight Inc. Policies. 2019 (Last updated: Oct 6, 2019)  
31  
32 339 <https://member.insight.rakuten.co.in/policies> (accessed 26 Jun 2021)  
33  
34
- 35 340 15 Tabuchi T, Shinozaki T, Kunugita N, et al. Study profile: The Japan “Society and New  
36 Tobacco” Internet Survey (JASTIS): A longitudinal internet cohort study of heat-not-burn  
37  
38 341  
39 tobacco products, electronic cigarettes, and conventional tobacco products in Japan. *J*  
40  
41 342  
42 343 *Epidemiol* 2019;29:444–50.  
43  
44
- 45 344 16. Umesawa M, Kobashi G. Epidemiology of hypertensive disorders in pregnancy:  
46 prevalence, risk factors, predictors and prognosis. *Hypertens Res* 2017;40:213–20.  
47 345  
48
- 49 346 17 Fujimoto S, Nakamura Y, Ikeda M et al. Utilization of maternal and child health  
50  
51 347  
52 handbook in Japan. *Nihon Koshu Eisei Zasshi* 2001;48:486–94.  
53
- 54 348 18 Osaki K, Hattori T, Toda A, et al. Maternal and Child Health Handbook use for maternal  
55 and child care: a cluster randomized controlled study in rural Java, Indonesia. *J Public*  
56 349  
57 350  
58 *Health (Oxf)* 2019;41:170–82.  
59  
60

- 1  
2  
3 351 19 Igarashi A, Aida J, Kusama T, et al. Heated tobacco products have reached younger or  
4  
5  
6 352 more affluent people in Japan. *J Epidemiol* 2021;31:187–93.  
7  
8 353 20 Nakajima M, Yamagishi S, Yamamoto H, et al. Deficient cotinine formation from  
9  
10 354 nicotine is attributed to the whole deletion of the CYP2A6 gene in humans. *Clin*  
11  
12 355 *Pharmacol Ther* 2000;67:57–69.  
13  
14 356 21 Yoshihara T, Zaitu M, Kubota S, et al. Pool walking may improve renal function by  
15  
16  
17 357 suppressing the renin-angiotensin-aldosterone system in healthy pregnant women. *Sci*  
18  
19 358 *Rep* 2020;10:2891.  
20  
21 359 22. Abraham M, Alramadhan S, Iniguez C, et al. A systematic review of maternal smoking  
22  
23  
24 360 during pregnancy and fetal measurements with meta-analysis. *PLOS ONE*  
25  
26 361 2017;12:e0170946.  
27  
28 362 23 Lorraine V. C, Itsuro Y, Geoffrey T.F, et al. Awareness of Marketing of Heated Tobacco  
29  
30  
31 363 Products and Cigarettes and Support for Tobacco Marketing Restrictions in Japan:  
32  
33 364 Findings from the 2018 International Tobacco Control (ITC) Japan Survey. *Int J Environ*  
34  
35 365 *Res Public Health* 2020;17:8418.  
36  
37 366 24 Nishihama Y, Nakayama SF, Tabuchi T, et al. Determination of urinary cotinine cut-off  
38  
39  
40 367 concentrations for pregnant women in the Japan environment and children's study  
41  
42 368 (JECS). *Int J Environ Res Public Health* 2020;17:5537.  
43  
44 369 25 Larcombe AN. Early-life exposure to electronic cigarettes: cause for concern. *Lancet*  
45  
46 370 *Respir Med* 2019;7:985–92.  
47  
48 371 26 Atrash HK, Johnson K, Adams M, et al. Preconception care for improving perinatal  
49  
50  
51 372 outcomes: the time to act. *Matern Child Health J* 2006;10(Suppl):S3–S11.  
52  
53  
54 373  
55  
56 374  
57  
58  
59  
60

1  
2  
3 375 **FIGURE LEGEND**  
4

5 376 **Figure 1. Odds ratio of ever heated tobacco product smokers with hypertensive**  
6  
7  
8 377 **disorders of pregnancy and low birth weight, compared with never heated tobacco**  
9  
10 378 **product smokers.** Age was adjusted in Model 1, and other covariates (combustible cigarette  
11  
12 379 smoking, educational attainment, occupation, household income, and comorbidity) were  
13  
14 380 additionally adjusted in Model 2. The samples for each analysis in Model 2 were as follows:  
15  
16 381 n=494 (overall), n=370 (never combustible cigarette smokers), and n=124 (ever combustible  
17  
18 382 cigarette smokers) for hypertensive disorders of pregnancy; and n=478 (overall), n=310  
19  
20 383 (never combustible cigarette smokers), and n=118 (ever combustible cigarette smokers) for  
21  
22 384 low birth weight. Abbreviations: HTP, heated tobacco products; OR, Odds ratio.  
23  
24  
25  
26 385  
27  
28  
29 386  
30  
31  
32  
33  
34  
35  
36  
37  
38  
39  
40  
41  
42  
43  
44  
45  
46  
47  
48  
49  
50  
51  
52  
53  
54  
55  
56  
57  
58  
59  
60

387 **Table 1. Characteristics of 558 post-delivery women and 365 currently pregnant women**

| Characteristics                         | N (%) or mean (SD)  |                  |                          |                  |
|-----------------------------------------|---------------------|------------------|--------------------------|------------------|
|                                         | Post-delivery women |                  | Currently pregnant women |                  |
|                                         | Never HTP smokers   | Ever HTP smokers | Never HTP smokers        | Ever HTP smokers |
| Overall                                 | <i>n</i> =493       | <i>n</i> =65     | <i>n</i> =319            | <i>n</i> =46     |
| Maternal and neonatal risk              |                     |                  |                          |                  |
| Hypertensive disorders of pregnancy     | 32 (6.5%)           | 9 (13.8%)*       | NA                       | NA               |
| Low birth weight <2500 g                | 44 (8.9%)           | 12 (18.5%)*      | NA                       | NA               |
| Preterm birth <37 weeks                 | 19 (3.9%)           | 4 (6.2%)         | NA                       | NA               |
| Imminent preterm birth                  | 82 (16.6%)          | 18 (27.7%)*      | NA                       | NA               |
| Age                                     | 32.4 (4.1)          | 30.9 (4.2)**     | 31.9 (4.3)               | 31.3 (4.7)       |
| Ever combustible cigarette smoking      | 82 (16.6%)          | 55 (84.6%***)    | 54 (16.9%)               | 41 (89.1%***)    |
| Educational attainment ≥13 years        | 410 (83.2%)         | 37 (56.9%***)    | 278 (87.1%)              | 31 (67.4%**)     |
| Managerial workers                      | 19 (3.9%)           | 5 (7.7%)         | 16 (5.0%)                | 2 (4.3%)         |
| Comorbidity of hypertension or diabetes | 35 (7.1%)           | 4 (6.2%)         | 4 (1.3%)                 | 4 (8.7%**)       |
| Household income                        |                     |                  |                          |                  |
| <200 million JPY                        | 13 (3.0%)           | 3 (5.2%)         | 6 (2.3%)                 | 1 (2.4%)         |
| 200 to <600 million JPY                 | 200 (45.9%)         | 30 (51.7%)       | 115 (43.7%)              | 19 (46.3%)       |
| ≥600 million JPY                        | 223 (51.1%)         | 25 (43.1%)       | 142 (54.0%)              | 21 (51.2%)       |
| Never combustible cigarette smokers     | <i>n</i> =411       | <i>n</i> =10     | <i>n</i> =265            | <i>n</i> =5      |
| Maternal and neonatal risk              |                     |                  |                          |                  |
| Hypertensive disorders of pregnancy     | 26 (6.3%)           | 1 (10.0%)        | NA                       | NA               |
| Low birth weight <2500 g                | 34 (8.3%)           | 3 (30.0%)*       | NA                       | NA               |
| Preterm birth <37 weeks                 | 17 (4.1%)           | 0 (0%)           | NA                       | NA               |
| Imminent preterm birth                  | 69 (16.8%)          | 3 (30.0%)        | NA                       | NA               |
| Age                                     | 32.2 (4.0)          | 33.3 (2.3)       | 31.7 (4.3)               | 30.2 (1.8)       |
| Educational attainment ≥13 years        | 348 (84.7%)         | 7 (70%)          | 235 (88.7%)              | 4 (80.0%)        |
| Managerial workers                      | 16 (3.9%)           | 1 (10%)          | 14 (5.3%)                | 0 (0%)           |

|                                         |               |               |               |              |
|-----------------------------------------|---------------|---------------|---------------|--------------|
| Comorbidity of hypertension or diabetes | 24 (5.8%)     | 0 (0%)        | 4 (1.5%)      | 0 (0%)       |
| Household income                        | <i>n</i> =361 | <i>n</i> =9   | <i>n</i> =219 | <i>n</i> =5  |
| <200 million JPY                        | 10 (2.8%)     | 0 (0%)        | 5 (2.3%)      | 0 (0%)       |
| 200 to <600 million JPY                 | 160 (44.3%)   | 4 (44.4%)     | 97 (44.3%)    | 3 (60.0%)    |
| ≥600 million JPY                        | 191 (52.9%)   | 5 (55.6%)     | 117 (53.45)   | 2 (40.0%)    |
| Ever combustible cigarette smokers      | <i>n</i> =82  | <i>n</i> =55  | <i>n</i> =54  | <i>n</i> =41 |
| Maternal and neonatal risk              |               |               |               |              |
| Hypertensive disorders of pregnancy     | 6 (7.3%)      | 8 (14.5%)     | NA            | NA           |
| Low birth weight <2500 g                | 10 (12.2%)    | 9 (16.4%)     | NA            | NA           |
| Preterm birth <37 weeks                 | 2 (2.4%)      | 4 (7.3%)      | NA            | NA           |
| Imminent preterm birth                  | 13 (15.9%)    | 15 (27.3%)    | NA            | NA           |
| Age                                     | 33.5 (4.3)    | 30.5 (4.3)*** | 32.9 (4.2)    | 31.4 (5.0)   |
| Educational attainment ≥13 years        | 62 (75.6%)    | 30 (54.5%)**  | 43 (79.6%)    | 27 (65.9%)   |
| Managerial workers                      | 3 (3.7%)      | 4 (7.3%)      | 2 (3.7%)      | 2 (4.9%)     |
| Comorbidity of hypertension or diabetes | 11 (13.4%)    | 4 (7.3%)      | 0 (0%)        | 4 (9.8%)*    |
| Household income                        | <i>n</i> =75  | <i>n</i> =49  | <i>n</i> =44  | <i>n</i> =36 |
| <200 million JPY                        | 3 (4.0%)      | 3 (6.1%)      | 1 (2.3%)      | 1 (2.8%)     |
| 200 to <600 million JPY                 | 40 (53.3%)    | 26 (53.1%)    | 18 (40.9%)    | 16 (44.4%)   |
| ≥600 million JPY                        | 32 (42.7%)    | 20 (40.8%)    | 25 (56.8%)    | 19 (52.8%)   |

388 Abbreviation: HTP, heated tobacco product; NA, not applicable.

389 \* $P < 0.05$ , \*\* $P < 0.01$ , \*\*\* $P < 0.001$  for chi-squared test or t-test.

390

391

392 **Table 2. Smoking status and use of heated tobacco products cross-classified according**  
 393 **to combustible cigarette smoking status**

| Characteristics                        | HTP smoking status |            |           |            |
|----------------------------------------|--------------------|------------|-----------|------------|
|                                        | Never              | Former     | Current   | Total      |
| Post-delivery women, <i>total</i>      | 493 (88.4%)        | 50 (9.0%)  | 15 (2.7%) | 558 (100%) |
| Never combustible cigarette smokers    | 411 (97.6%)        | 9 (2.1%)   | 1 (0.2%)  | 421 (100%) |
| Former combustible cigarette smokers   | 79 (64.2%)         | 32 (26.0%) | 12 (9.8%) | 123 (100%) |
| Current combustible cigarette smokers  | 3 (21.4%)          | 9 (64.3%)  | 2 (14.3%) | 14 (100%)  |
| Currently pregnant women, <i>total</i> | 319 (87.4%)        | 42 (11.5%) | 4 (1.1%)  | 365 (100%) |
| Never combustible cigarette smokers    | 265 (98.1%)        | 5 (1.9%)   | 0 (0%)    | 270 (100%) |
| Former combustible cigarette smokers   | 54 (59.3%)         | 33 (36.3%) | 4 (4.4%)  | 91 (100%)  |
| Current combustible cigarette smokers  | 0 (0%)             | 4 (100%)   | 0 (0%)    | 4 (100%)   |

394 Abbreviation: HTP, heated tobacco product.

395

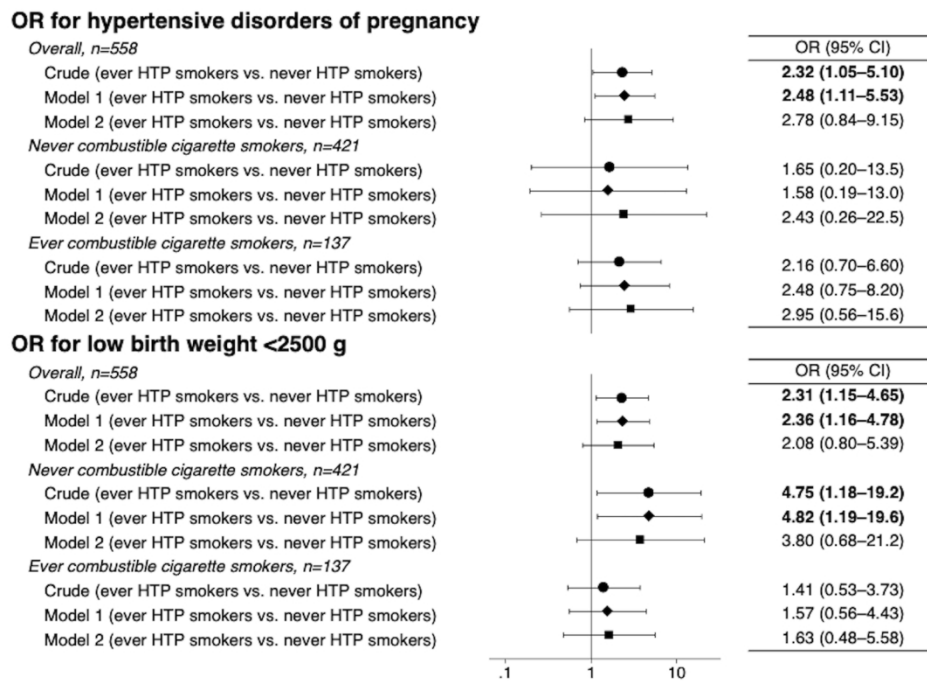

Figure 1. Odds ratio of ever heated tobacco product smokers with hypertensive disorders of pregnancy and low birth weight, compared with never heated tobacco product smokers. Age was adjusted in Model 1, and other covariates (combustible cigarette smoking, educational attainment, occupation, household income, and comorbidity) were additionally adjusted in Model 2. The samples for each analysis in Model 2 were as follows: n=494 (overall), n=370 (never combustible cigarette smokers), and n=124 (ever combustible cigarette smokers) for hypertensive disorders of pregnancy; and n=478 (overall), n=310 (never combustible cigarette smokers), and n=118 (ever combustible cigarette smokers) for low birth weight. Abbreviations: HTP, heated tobacco products; OR, Odds ratio.

139x99mm (300 x 300 DPI)



### Checklist for Reporting Results of Internet E-Surveys (CHERRIES)

| <b>Checklist Item</b>            | <b>Explanation</b>                                                                                                                                                                                                                                                                                                                                                                                                                            | <b>Page Number</b> |
|----------------------------------|-----------------------------------------------------------------------------------------------------------------------------------------------------------------------------------------------------------------------------------------------------------------------------------------------------------------------------------------------------------------------------------------------------------------------------------------------|--------------------|
| Describe survey design           | Describe target population, sample frame. Is the sample a convenience sample? (In "open" surveys this is most likely.)                                                                                                                                                                                                                                                                                                                        | P5                 |
| IRB approval                     | Mention whether the study has been approved by an IRB.                                                                                                                                                                                                                                                                                                                                                                                        | P6                 |
| Informed consent                 | Describe the informed consent process. Where were the participants told the length of time of the survey, which data were stored and where and for how long, who the investigator was, and the purpose of the study?                                                                                                                                                                                                                          | P6                 |
| Data protection                  | If any personal information was collected or stored, describe what mechanisms were used to protect unauthorized access.                                                                                                                                                                                                                                                                                                                       | P5                 |
| Development and testing          | State how the survey was developed, including whether the usability and technical functionality of the electronic questionnaire had been tested before fielding the questionnaire.                                                                                                                                                                                                                                                            | P5                 |
| Open survey versus closed survey | An "open survey" is a survey open for each visitor of a site, while a closed survey is only open to a sample which the investigator knows (password-protected survey).                                                                                                                                                                                                                                                                        | P5                 |
| Contact mode                     | Indicate whether or not the initial contact with the potential participants was made on the Internet. (Investigators may also send out questionnaires by mail and allow for Web-based data entry.)                                                                                                                                                                                                                                            | P5                 |
| Advertising the survey           | How/where was the survey announced or advertised? Some examples are offline media (newspapers), or online (mailing lists – If yes, which ones?) or banner ads (Where were these banner ads posted and what did they look like?). It is important to know the wording of the announcement as it will heavily influence who chooses to participate. Ideally the survey announcement should be published as an appendix.                         | P5                 |
| Web/E-mail                       | State the type of e-survey (eg, one posted on a Web site, or one sent out through e-mail). If it is an e-mail survey, were the responses entered manually into a database, or was there an automatic method for capturing responses?                                                                                                                                                                                                          | P5                 |
| Context                          | Describe the Web site (for mailing list/newsgroup) in which the survey was posted. What is the Web site about, who is visiting it, what are visitors normally looking for? Discuss to what degree the content of the Web site could pre-select the sample or influence the results. For example, a survey about vaccination on an anti-immunization Web site will have different results from a Web survey conducted on a government Web site | P5                 |
| Mandatory/voluntary              | Was it a mandatory survey to be filled in by every visitor who wanted to enter the Web site, or was it a voluntary survey?                                                                                                                                                                                                                                                                                                                    | P5                 |
| Incentives                       | Were any incentives offered (eg, monetary, prizes, or non-monetary incentives such as an offer to provide the survey results)?                                                                                                                                                                                                                                                                                                                | Yes (P5)           |

|                                                                                                           |                                                                                                                                                                                                                                                                                                                                                                                                                                                                                               |          |
|-----------------------------------------------------------------------------------------------------------|-----------------------------------------------------------------------------------------------------------------------------------------------------------------------------------------------------------------------------------------------------------------------------------------------------------------------------------------------------------------------------------------------------------------------------------------------------------------------------------------------|----------|
| Time/Date                                                                                                 | In what timeframe were the data collected?                                                                                                                                                                                                                                                                                                                                                                                                                                                    | P5       |
| Randomization of items or questionnaires                                                                  | To prevent biases items can be randomized or alternated.                                                                                                                                                                                                                                                                                                                                                                                                                                      | Not used |
| Adaptive questioning                                                                                      | Use adaptive questioning (certain items, or only conditionally displayed based on responses to other items) to reduce number and complexity of the questions.                                                                                                                                                                                                                                                                                                                                 | Yes      |
| Number of Items                                                                                           | What was the number of questionnaire items per page? The number of items is an important factor for the completion rate.                                                                                                                                                                                                                                                                                                                                                                      | P5       |
| Number of screens (pages)                                                                                 | Over how many pages was the questionnaire distributed? The number of items is an important factor for the completion rate.                                                                                                                                                                                                                                                                                                                                                                    | P5       |
| Completeness check                                                                                        | It is technically possible to do consistency or completeness checks before the questionnaire is submitted. Was this done, and if "yes", how (usually JavaScript)? An alternative is to check for completeness after the questionnaire has been submitted (and highlight mandatory items). If this has been done, it should be reported. All items should provide a non-response option such as "not applicable" or "rather not say", and selection of one response option should be enforced. | No       |
| Review step                                                                                               | State whether respondents were able to review and change their answers (eg, through a Back button or a Review step which displays a summary of the responses and asks the respondents if they are correct).                                                                                                                                                                                                                                                                                   | No       |
| Unique site visitor                                                                                       | If you provide view rates or participation rates, you need to define how you determined a unique visitor. There are different techniques available, based on IP addresses or cookies or both.                                                                                                                                                                                                                                                                                                 | P5       |
| View rate (Ratio of unique survey visitors/unique site visitors)                                          | Requires counting unique visitors to the first page of the survey, divided by the number of unique site visitors (not page views!). It is not unusual to have view rates of less than 0.1 % if the survey is voluntary.                                                                                                                                                                                                                                                                       | N/A      |
| Participation rate (Ratio of unique visitors who agreed to participate/unique first survey page visitors) | Count the unique number of people who filled in the first survey page (or agreed to participate, for example by checking a checkbox), divided by visitors who visit the first page of the survey (or the informed consents page, if present). This can also be called "recruitment" rate.                                                                                                                                                                                                     | P5       |
| Completion rate (Ratio of users who finished the survey/users who                                         | The number of people submitting the last questionnaire page, divided by the number of people who agreed to participate (or submitted the first survey page). This is only relevant if there is a separate "informed consent" page or if the survey goes over several pages. This is a measure for attrition. Note that                                                                                                                                                                        | N/A      |

|    |                                                     |                                                                                                                                                                                                                                                                                                                                                                                                                                                                                                                                                                            |          |
|----|-----------------------------------------------------|----------------------------------------------------------------------------------------------------------------------------------------------------------------------------------------------------------------------------------------------------------------------------------------------------------------------------------------------------------------------------------------------------------------------------------------------------------------------------------------------------------------------------------------------------------------------------|----------|
| 1  | agreed to participate)                              | "completion" can involve leaving questionnaire items blank. This is not a measure for how completely questionnaires were filled in. (If you need a measure for this, use the word "completeness rate".)                                                                                                                                                                                                                                                                                                                                                                    |          |
| 2  |                                                     |                                                                                                                                                                                                                                                                                                                                                                                                                                                                                                                                                                            |          |
| 3  |                                                     |                                                                                                                                                                                                                                                                                                                                                                                                                                                                                                                                                                            |          |
| 4  |                                                     |                                                                                                                                                                                                                                                                                                                                                                                                                                                                                                                                                                            |          |
| 5  |                                                     |                                                                                                                                                                                                                                                                                                                                                                                                                                                                                                                                                                            |          |
| 6  | Cookies used                                        | Indicate whether cookies were used to assign a unique user identifier to each client computer. If so, mention the page on which the cookie was set and read, and how long the cookie was valid. Were duplicate entries avoided by preventing users access to the survey twice; or were duplicate database entries having the same user ID eliminated before analysis? In the latter case, which entries were kept for analysis (eg, the first entry or the most recent)?                                                                                                   | P5       |
| 7  |                                                     |                                                                                                                                                                                                                                                                                                                                                                                                                                                                                                                                                                            |          |
| 8  |                                                     |                                                                                                                                                                                                                                                                                                                                                                                                                                                                                                                                                                            |          |
| 9  |                                                     |                                                                                                                                                                                                                                                                                                                                                                                                                                                                                                                                                                            |          |
| 10 |                                                     |                                                                                                                                                                                                                                                                                                                                                                                                                                                                                                                                                                            |          |
| 11 | IP check                                            | Indicate whether the IP address of the client computer was used to identify potential duplicate entries from the same user. If so, mention the period of time for which no two entries from the same IP address were allowed (eg, 24 hours). Were duplicate entries avoided by preventing users with the same IP address access to the survey twice; or were duplicate database entries having the same IP address within a given period of time eliminated before analysis? If the latter, which entries were kept for analysis (eg, the first entry or the most recent)? | P5       |
| 12 |                                                     |                                                                                                                                                                                                                                                                                                                                                                                                                                                                                                                                                                            |          |
| 13 |                                                     |                                                                                                                                                                                                                                                                                                                                                                                                                                                                                                                                                                            |          |
| 14 |                                                     |                                                                                                                                                                                                                                                                                                                                                                                                                                                                                                                                                                            |          |
| 15 |                                                     |                                                                                                                                                                                                                                                                                                                                                                                                                                                                                                                                                                            |          |
| 16 |                                                     |                                                                                                                                                                                                                                                                                                                                                                                                                                                                                                                                                                            |          |
| 17 |                                                     |                                                                                                                                                                                                                                                                                                                                                                                                                                                                                                                                                                            |          |
| 18 | Log file analysis                                   | Indicate whether other techniques to analyze the log file for identification of multiple entries were used. If so, please describe.                                                                                                                                                                                                                                                                                                                                                                                                                                        | P5       |
| 19 |                                                     |                                                                                                                                                                                                                                                                                                                                                                                                                                                                                                                                                                            |          |
| 20 |                                                     |                                                                                                                                                                                                                                                                                                                                                                                                                                                                                                                                                                            |          |
| 21 | Registration                                        | In "closed" (non-open) surveys, users need to login first and it is easier to prevent duplicate entries from the same user. Describe how this was done. For example, was the survey never displayed a second time once the user had filled it in, or was the username stored together with the survey results and later eliminated? If the latter, which entries were kept for analysis (eg, the first entry or the most recent)?                                                                                                                                          | P5       |
| 22 |                                                     |                                                                                                                                                                                                                                                                                                                                                                                                                                                                                                                                                                            |          |
| 23 |                                                     |                                                                                                                                                                                                                                                                                                                                                                                                                                                                                                                                                                            |          |
| 24 |                                                     |                                                                                                                                                                                                                                                                                                                                                                                                                                                                                                                                                                            |          |
| 25 | Handling of incomplete questionnaires               | Were only completed questionnaires analyzed? Were questionnaires which terminated early (where, for example, users did not go through all questionnaire pages) also analyzed?                                                                                                                                                                                                                                                                                                                                                                                              | P5       |
| 26 |                                                     |                                                                                                                                                                                                                                                                                                                                                                                                                                                                                                                                                                            |          |
| 27 |                                                     |                                                                                                                                                                                                                                                                                                                                                                                                                                                                                                                                                                            |          |
| 28 | Questionnaires submitted with an atypical timestamp | Some investigators may measure the time people needed to fill in a questionnaire and exclude questionnaires that were submitted too soon. Specify the timeframe that was used as a cut-off point, and describe how this point was determined.                                                                                                                                                                                                                                                                                                                              | Not used |
| 29 |                                                     |                                                                                                                                                                                                                                                                                                                                                                                                                                                                                                                                                                            |          |
| 30 |                                                     |                                                                                                                                                                                                                                                                                                                                                                                                                                                                                                                                                                            |          |
| 31 |                                                     |                                                                                                                                                                                                                                                                                                                                                                                                                                                                                                                                                                            |          |
| 32 | Statistical correction                              | Indicate whether any methods such as weighting of items or propensity scores have been used to adjust for the non-representative sample; if so, please describe the methods.                                                                                                                                                                                                                                                                                                                                                                                               | Not used |
| 33 |                                                     |                                                                                                                                                                                                                                                                                                                                                                                                                                                                                                                                                                            |          |
| 34 |                                                     |                                                                                                                                                                                                                                                                                                                                                                                                                                                                                                                                                                            |          |
| 35 |                                                     |                                                                                                                                                                                                                                                                                                                                                                                                                                                                                                                                                                            |          |

36 This checklist has been modified from Eysenbach G. Improving the quality of Web surveys: the Checklist for Reporting Results of Internet E-Surveys (CHERRIES). J Med Internet Res. 2004 Sep 29;6(3):e34 [erratum in J Med Internet Res. 2012; 14(1): e8.]. Article available at  
37 <https://www.jmir.org/2004/3/e34/>; erratum available <https://www.jmir.org/2012/1/e8/>. Copyright ©Gunther Eysenbach. Originally published in the  
38 [Journal of Medical Internet](https://www.jmir.org/2004/3/e34/) Research, 29.9.2004 and 04.01.2012.  
39  
40

1  
2  
3 This is an open-access article distributed under the terms of the Creative Commons Attribution License (<https://creativecommons.org/licenses/by/2.0/>),  
4 which permits unrestricted use, distribution, and reproduction in any medium, provided the original work, first published in the Journal of Medical Internet  
5 Research, is properly cited.  
6  
7  
8  
9  
10  
11  
12  
13  
14  
15  
16  
17  
18  
19  
20  
21  
22  
23  
24  
25  
26  
27  
28  
29  
30  
31  
32  
33  
34  
35  
36  
37  
38  
39  
40  
41  
42  
43  
44  
45  
46

For peer review only

# BMJ Open

## Heated tobacco product use and hypertensive disorders of pregnancy and low birth weight: Analysis of a cross-sectional, web-based survey in Japan

|                                 |                                                                                                                                                                                                                                                                                                                                                                                                                                                                                                                                                                                                                                                                                       |
|---------------------------------|---------------------------------------------------------------------------------------------------------------------------------------------------------------------------------------------------------------------------------------------------------------------------------------------------------------------------------------------------------------------------------------------------------------------------------------------------------------------------------------------------------------------------------------------------------------------------------------------------------------------------------------------------------------------------------------|
| Journal:                        | <i>BMJ Open</i>                                                                                                                                                                                                                                                                                                                                                                                                                                                                                                                                                                                                                                                                       |
| Manuscript ID                   | bmjopen-2021-052976.R2                                                                                                                                                                                                                                                                                                                                                                                                                                                                                                                                                                                                                                                                |
| Article Type:                   | Original research                                                                                                                                                                                                                                                                                                                                                                                                                                                                                                                                                                                                                                                                     |
| Date Submitted by the Author:   | 22-Aug-2021                                                                                                                                                                                                                                                                                                                                                                                                                                                                                                                                                                                                                                                                           |
| Complete List of Authors:       | Zaitsu, Masayoshi ; Dokkyo Medical University School of Medicine Graduate School of Medicine, Department of Public Health<br>Hosokawa, Yoshihiko; Dokkyo Medical University School of Medicine Graduate School of Medicine, Department of Public Health; University of Tsukuba, Department of Obstetrics and Gynecology<br>Okawa, Sumiyo; Osaka Medical Center for Cancer and Cardiovascular Diseases<br>Hori, Ai; University of Tsukuba, Department of Global Public Health<br>Kobashi, Gen; Dokkyo Medical University School of Medicine Graduate School of Medicine, Department of Public Health<br>Tabuchi, Takahiro; Osaka Medical Center for Cancer and Cardiovascular Diseases |
| <b>Primary Subject Heading</b>: | Public health                                                                                                                                                                                                                                                                                                                                                                                                                                                                                                                                                                                                                                                                         |
| Secondary Subject Heading:      | Respiratory medicine, Reproductive medicine                                                                                                                                                                                                                                                                                                                                                                                                                                                                                                                                                                                                                                           |
| Keywords:                       | COVID-19, Fetal medicine < OBSTETRICS, Maternal medicine < OBSTETRICS, PUBLIC HEALTH, TOXICOLOGY, Epidemiology < THORACIC MEDICINE                                                                                                                                                                                                                                                                                                                                                                                                                                                                                                                                                    |
|                                 |                                                                                                                                                                                                                                                                                                                                                                                                                                                                                                                                                                                                                                                                                       |

SCHOLARONE™  
Manuscripts



I, the Submitting Author has the right to grant and does grant on behalf of all authors of the Work (as defined in the below author licence), an exclusive licence and/or a non-exclusive licence for contributions from authors who are: i) UK Crown employees; ii) where BMJ has agreed a CC-BY licence shall apply, and/or iii) in accordance with the terms applicable for US Federal Government officers or employees acting as part of their official duties; on a worldwide, perpetual, irrevocable, royalty-free basis to BMJ Publishing Group Ltd ("BMJ") its licensees and where the relevant Journal is co-owned by BMJ to the co-owners of the Journal, to publish the Work in this journal and any other BMJ products and to exploit all rights, as set out in our [licence](#).

The Submitting Author accepts and understands that any supply made under these terms is made by BMJ to the Submitting Author unless you are acting as an employee on behalf of your employer or a postgraduate student of an affiliated institution which is paying any applicable article publishing charge ("APC") for Open Access articles. Where the Submitting Author wishes to make the Work available on an Open Access basis (and intends to pay the relevant APC), the terms of reuse of such Open Access shall be governed by a Creative Commons licence – details of these licences and which [Creative Commons](#) licence will apply to this Work are set out in our licence referred to above.

Other than as permitted in any relevant BMJ Author's Self Archiving Policies, I confirm this Work has not been accepted for publication elsewhere, is not being considered for publication elsewhere and does not duplicate material already published. I confirm all authors consent to publication of this Work and authorise the granting of this licence.

1  
2  
3 **1 Heated tobacco product use and hypertensive disorders of pregnancy and low birth**  
4  
5 **2 weight: Analysis of a cross-sectional, web-based survey in Japan**  
6  
7  
8  
9

10 4 Masayoshi Zaitso,<sup>1,\*</sup> Yoshihiko Hosokawa,<sup>1,2,\*</sup> Sumiyo Okawa,<sup>3</sup> Ai Hori,<sup>4</sup> Gen Kobashi,<sup>1</sup>  
11  
12 5 Takahiro Tabuchi<sup>3</sup>  
13  
14  
15  
16

17 7 <sup>1</sup> Department of Public Health, School of Medicine, Dokkyo Medical University, Tochigi,  
18  
19 8 Japan  
20

21 9 <sup>2</sup> Department of Obstetrics and Gynecology, Faculty of Medicine, University of Tsukuba,  
22  
23 10 Ibaraki, Japan  
24

25  
26 11 <sup>3</sup> Cancer Control Center, Osaka Medical Center for Cancer and Cardiovascular Diseases,  
27  
28 12 Osaka, Japan  
29

30  
31 13 <sup>4</sup> Department of Global Public Health, University of Tsukuba, Tsukuba, Ibaraki, Japan  
32

33 14 \* These authors contributed equally to this work.  
34  
35  
36  
37

38 16 **Corresponding author:** Masayoshi Zaitso, MD, PhD  
39

40 17 Department of Public Health, School of Medicine, Dokkyo Medical University  
41

42 18 880 Kitakobayashi, Mibu, Shimotsuga-gun, Tochigi, 321-0293 Japan  
43

44  
45 19 Tel: +81-282-87-2133; Fax: +81-282-86-2935  
46

47 20 Email: m-zaitso@dokkyomed.ac.jp  
48

49 21 ORCID: [orcid.org/0000-0001-7616-355X](https://orcid.org/0000-0001-7616-355X)  
50  
51  
52

53  
54 23 **Word count:** 2544 words  
55  
56  
57  
58  
59  
60

1  
2  
3 24 **ABSTRACT**  
4

5 25 **Objectives:** Knowledge on the impact of heated tobacco product (HTP) use in pregnant  
6  
7  
8 26 women with associated maternal and neonatal risks for hypertensive disorders of pregnancy  
9  
10 27 (HDP) and low birth weight (LBW) is limited. We aimed to assess the status of HTP use  
11  
12 28 among pregnant women in Japan and explore the association of HTP use with HDP and  
13  
14 29 LBW.  
15

16  
17 30 **Design:** cross-sectional study  
18

19 31 **Setting:** Data from the Japan “COVID-19 and Society” Internet Survey study, a web-based  
20  
21 32 nationwide survey  
22  
23

24 33 **Participants:** We investigated 558 post-delivery and 365 currently pregnant women in  
25  
26 34 October 2020.  
27

28 35 **Primary and secondary outcome measures:** Information on HDP and LBW was collected  
29  
30 36 from the post-delivery women’s Maternal and Child Health Handbooks (maternal and  
31  
32 37 newborn records). We estimated the age-adjusted odds ratios (ORs) and 95% confidence  
33  
34 38 intervals (CIs) of ever HTP smokers for HDP and LBW and compared them with those of  
35  
36 39 never HTP smokers in a logistic regression analysis.  
37  
38

39 40 **Results:** The prevalence of ever and current HTP use were 11.7% and 2.7% in post-delivery  
41  
42 41 women and 12.6% and 1.1% in currently pregnant women, respectively. Among currently  
43  
44 42 pregnant women who were former combustible cigarette smokers, 4.4% (4/91) were current  
45  
46 43 HTP smokers. Among post-delivery women, ever HTP smokers had a higher HDP incidence  
47  
48 44 (13.8% vs. 6.5%,  $P=0.03$ ; age-adjusted OR=2.48, 95% CI 1.11–5.53) and higher LBW  
49  
50 45 incidence (18.5% versus 8.9%,  $P=0.02$ ; age-adjusted OR=2.36, 95% CI 1.16–4.87).  
51  
52

53 46 **Conclusions:** In Japan, the incidence of ever HTP use exceeded 10% among pregnant  
54  
55 47 women, and HTP smoking may be associated with maternal and neonatal risks.  
56  
57  
58  
59  
60



1  
2  
3 49 **Keywords:** heated tobacco products, hypertensive disorders of pregnancy, COVID-19,  
4  
5 50 smoking, preconception  
6  
7  
8 51

9  
10 52 **Strengths and limitations of this study:**

- 11  
12 53 ● This study covered all heated tobacco products (HTPs) available during the study period.  
13  
14 54 ● All participants were asked to base their responses on information in their Maternal and  
15  
16 55 Child Health Handbooks, a well-established home-based maternal and neonatal record of  
17  
18 56 pregnancy.  
19  
20 57 ● The web-based, self-reported, cross-sectional study had a small sample size and thus  
21  
22 58 involved a selection bias and reduced statistical precision, and causal mechanisms could  
23  
24 59 not be examined.  
25  
26 60 ● The lack of information on HTP smoking during pregnancy limited the assessment of the  
27  
28 61 direct impact of HTP use on pregnancy outcomes.  
29  
30 62 ● The participants' relevant medical histories were not assessed.  
31  
32  
33  
34  
35  
36  
37  
38  
39  
40  
41  
42  
43  
44  
45  
46  
47  
48  
49  
50  
51  
52  
53  
54  
55  
56  
57  
58  
59  
60

## 64 INTRODUCTION

65 The use of heated tobacco products (HTPs) is an emerging public health concern.[1] Since  
66 the initial marketing of HTPs in 2014, the prevalence of HTP use has increased in Japan, with  
67 a registered prevalence above 15% in the young population aged 20–39 years in 2019.[2]  
68 This prevalence remained above 15% during the coronavirus disease (COVID-19) pandemic  
69 in 2020.[3] The use of HTPs is increasing worldwide, particularly in the younger population;  
70 the prevalence of HTP use among Guatemala adolescents was 2.9% in 2020.[4]

71 Although the advertisement of HTPs (e.g., reduced harmfulness and a smoke-free  
72 image) promotes the impression that HTPs are healthy alternatives to combustible  
73 cigarettes,[5] HTP-related unfavorable health outcomes, including acute respiratory and  
74 cardiovascular risks, are likely to occur.[6, 7] However, existing knowledge on HTP use and  
75 its association with maternal and neonatal risks in pregnant women is limited. The two  
76 commonest life-threatening maternal and neonatal risks are hypertensive disorders of  
77 pregnancy (HDP) and low birth weight (LBW).[8, 9] Although there are controversial reports  
78 on the association between HDP and combustible cigarette use,[10] combustible cigarettes  
79 are known to increase various maternal and neonatal risks in Japan.[11, 12] Therefore, in this  
80 study, we focused on the association of HTP use with HDP and LBW, which are partly linked  
81 to other perinatal risks such as preterm birth.

82 This study aimed to assess the status of HTP use among pregnant women in Japan and  
83 explore HTP-associated perinatal risks, in particular the risk of HDP and LBW, by analyzing  
84 data from a nationwide web-based survey in Japan that contained information on pregnancy,  
85 behavioral factors (e.g., HTP use and combustible cigarette smoking), and social background.

## 88 MATERIALS AND METHODS

## 89 **Study design, data setting, and participants**

90 This cross-sectional internet-based study is part of the Japan COVID-19 and Society Internet  
91 Survey (JACSIS) study. The JACSIS study comprises three surveys in the following three  
92 target populations: (a) young people and adults aged 15–79 years, (b) currently pregnant and  
93 post-delivery women, and (c) adults living in a single-parent household. The study samples  
94 for each survey were retrieved from the pooled panels of an internet research agency  
95 (Rakuten Insight, Inc., which had approximately 2.2 million panelists in 2019).[13] We used  
96 data from currently pregnant and post-delivery women, which were collected in October  
97 2020.

98 The internet research agency initially identified 21,896 eligible women who gave birth  
99 after October 2019 or who were expected to give birth by March 2021; however, our target  
100 sample size was 1,000 women due to the available study budget. Using a computer algorithm,  
101 the internet research agency randomly selected 4373 women to reach the target sample size of  
102 1000. Quality control methods for the sampling of panelists and other policies for panelists  
103 by the internet research agency have been described elsewhere.[14] An invitation e-mail was  
104 sent to the selected 4373 women; they were to complete the questionnaire through a  
105 designated website containing the survey questionnaire (made up of 61 questions, one  
106 question per page). Data collection started on October 15, 2020, and ended on October 25,  
107 2020, when the target sample size of 1000 by natural course (response rate, 22.9%) was met.  
108 Next, we obtained de-identified data from 1000 women from the internet research agency,  
109 and the study population was stratified by delivery date as follows: (a) 600 post-delivery  
110 women who delivered in October 2019–October 2020 (the number for October 2019–March  
111 2020, April–May 2020, and June–October 2020 was 200 each) and (b) 400 currently  
112 pregnant women who were expected to deliver in October 2020–March 2021.

1  
2  
3 113 Seventy-seven (42 post-delivery and 35 currently pregnant women) participants who  
4  
5 114 provided irrelevant or conflicting information were excluded, like it was done in previous  
6  
7  
8 115 studies of the same research agency.[15] A total of 923 (558 post-delivery and 365 currently  
9  
10 116 pregnant women) participants were included in the analysis. Informed consent was obtained  
11  
12 117 electronically before the study participants answered the web-based questionnaire, and the  
13  
14 118 Institutional Review Board of the Osaka International Cancer Institute approved the study  
15  
16  
17 119 (Protocol Number 20084).  
18  
19  
20  
21

### 22 121 **Definition of HDP and LBW**

23  
24 122 Data on HDP and LBW were extracted from the web-based self-reported  
25  
26 123 questionnaires. The incidence of HDP was based on whether the study participants had been  
27  
28 124 diagnosed with HDP or preeclampsia during pregnancy. The criteria for HDP diagnosis in  
29  
30 125 Japan were derived from the criteria of the American College of Obstetricians and  
31  
32 126 Gynecologists (i.e., systolic blood pressure  $\geq 140$  mmHg or diastolic blood pressure  $\geq 90$   
33  
34 127 mmHg after the 20th week of gestation).[16] The incidence of LBW was defined on the basis  
35  
36 128 of the diagnosis of LBW (birth weight  $< 2500$  g). All municipalities issue a handbook to all  
37  
38 129 pregnant women in which medical professionals record the health information of the mother  
39  
40 130 and child, including clinical outcomes (e.g., blood pressure and birth weight) and incident  
41  
42 131 diagnoses (e.g., HDP and LBW) during pregnancy; this is part of a national maternal and  
43  
44 132 child health policy. Mothers seldom lose their Maternal and Child Health Handbooks (losing  
45  
46 133 rate,  $< 1\%$ ).[17]  
47  
48  
49  
50

51 134 All participants were asked to provide information from their Maternal and Child  
52  
53 135 Health Handbooks. Although the definitions of HDP and LBW were based on diagnosis only  
54  
55 136 (treatment information was not obtained), the information was reliable, since Maternal and  
56  
57  
58  
59  
60

1  
2  
3 137 Child Health Handbooks are well-established integrated home-based records of maternal,  
4  
5 138 newborn, and child health.[17, 18]  
6  
7  
8 139

### 10 140 **HTP and cigarette smoking and other covariates**

11  
12 141 In the questionnaire, study participants were asked to indicate their smoking status (never,  
13  
14 142 once or a few times [trial smoking and not habitual], former, sometimes [habitual], or every  
15  
16 143 day) for each HTP that was available in the study period (Ploom Tech, Ploom Tech plus,  
17  
18 144 Ploom S, IQOS, glo, glo sens, and PULZE). Participants who answered “never” for all HTPs  
19  
20 145 were considered as never HTP smokers; the remaining participants were considered as ever  
21  
22 146 HTP smokers. Therefore, the ever HTP smoking group included those who used HTPs before  
23  
24 147 pregnancy and during pregnancy altogether. We could not specifically distinguish the impacts  
25  
26 148 of HTP smoking during pregnancy from that of HTP smoking before pregnancy.  
27  
28  
29

30  
31 149 The status of combustible cigarette smoking was classified as never smoker and ever  
32  
33 150 smoker. It was impossible to further classify the smokers into former or dual smokers due to  
34  
35 151 the nature of the study. The other covariates included age, educational attainment ( $\leq 12$  years  
36  
37 152 [high school] or  $\geq 13$  years [college or university]), occupation (manager or others),  
38  
39 153 household income ( $< 2$  million JPY [approximately 20,000 USD], 2 to  $< 6$  million JPY, and  $\geq 6$   
40  
41 154 million JPY), and comorbidity (having hypertension or diabetes).[19]  
42  
43  
44  
45  
46

### 47 156 **Statistical analysis**

48  
49 157 Descriptive statistics were computed and compared using the t-test or chi-squared test. The  
50  
51 158 prevalence of ever HTP smokers was assessed among the post-delivery and currently  
52  
53 159 pregnant women. Additionally, the HTP smoking status was cross-classified according to the  
54  
55 160 combustible cigarette smoking status of the currently pregnant and post-delivery women.  
56  
57  
58  
59  
60

1  
2  
3 161 To assess the potential association between HTP smoking and perinatal risk of HDP  
4  
5 162 and LBW, the sample was reduced to 558 post-delivery women who could complete all the  
6  
7 163 assessments during their pregnancy (Table 1). In the multivariable logistic regression  
8  
9 164 analyses, the odds ratio (OR) and 95% confidence interval (CI) of ever HTP smokers for  
10  
11 165 HDP risk were estimated after adjustment for age (Model 1, the main model in this study).  
12  
13 166 The never HTP smokers comprised the reference group. In Model 2, full adjustments for  
14  
15 167 other explanatory variables (combustible cigarette smoking, educational attainment,  
16  
17 168 occupation, household income, and comorbidity) were performed, and 64 participants with  
18  
19 169 missing information on household income were excluded. The same analyses were performed  
20  
21 170 for LBW.

22  
23  
24  
25  
26 171 For the sensitivity analysis, a stratified analysis with respect to combustible cigarette  
27  
28 172 smoking (never/ever) was performed. In addition, using a different reference group that  
29  
30 173 included those who never smoked any form of tobacco (HTPs and combustible cigarettes),  
31  
32 174 the ORs of ever HTP smokers for HDP and LBW risks were estimated.

33  
34  
35 175 Alpha was set at 0.05, and all *P* values were two sided. Data were analyzed using  
36  
37 176 STATA/MP13.1 (StataCorp LLC, College Station, TX).

### 38 177 39 40 41 42 178 **Patient and Public Involvement**

43  
44 179 Neither patients nor the public was involved.  
45  
46  
47  
48  
49  
50  
51

## 52 182 **RESULTS**

53  
54 183 Among 558 post-delivery women, the incidences of HDP and LBW were 7.3% (n=41) and  
55  
56 184 10.0% (n=56), respectively, and the prevalence of ever HTP smokers was 11.7% (n=65,  
57  
58 185 Table 1). Furthermore, among the 365 currently pregnant women, the prevalence of ever HTP  
59  
60

186 smokers was 12.6% (n=46), which did not differ from that of HTP smokers among post-  
187 delivery women ( $P=0.66$ ).

188 Among the currently pregnant women, 4.4% (4/91 participants) of the former  
189 combustible cigarette smokers reported smoking HTPs during pregnancy (Table 2),  
190 corresponding to 1.1% (4/365 participants) of currently pregnant women. In addition, 36.3%  
191 (33/91 participants) of former combustible cigarette smokers quit HTP smoking during  
192 pregnancy, corresponding to 11.5% (42/365 participants) of currently pregnant women.

193 Among the post-delivery women, the HDP incidence was higher in ever HTP smokers  
194 than in never HTP smokers (13.8% [n=9] vs. 6.5% [n=35],  $P=0.03$ ; Table 1). Similarly, the  
195 incidence of LBW was higher among ever HTP smokers than among never HTP smokers  
196 (18.5% [n=12] vs. 8.9% [n=44],  $P=0.02$ ; Table 1). When stratified by combustible cigarette  
197 smoking, a similar pattern was observed among never and ever combustible cigarette  
198 smokers (Table 1).

199 In the regression analysis, the age-adjusted ORs for HDP and LBW were elevated in  
200 ever HTP smokers (Model 1); the ORs for HDP and LBW were 2.48 (95% CI, 1.11–5.53)  
201 and 2.36 (95% CI, 1.16–4.78), respectively. However, the elevated ORs were not significant  
202 after adjusting for other covariates (Model 2, Figure 1). In the same regression analyses  
203 (Model 2), while ever combustible cigarette smokers were not associated with perinatal  
204 outcomes, the ORs of managerial workers for HDP and LBW were 3.92 (95% CI 1.16–13.2)  
205 and 3.74 (95% CI 1.41–9.93), respectively.

206 In the sensitivity analyses, when stratified by combustible cigarette smoking, a similar  
207 pattern was observed independently in never and ever combustible cigarette smokers (Figure  
208 1). For instance, among never combustible cigarette smokers, the age-adjusted OR of HTP  
209 use for LBW was 4.82 (95% CI, 1.19–19.6). A further analysis comparing 65 ever HTP  
210 smokers in the post-delivery group and 411 never tobacco smokers showed similar results:

1  
2  
3 211 compared with those who never smoked any form of tobacco, the age-adjusted ORs of ever  
4  
5 212 HTP smokers for HDP and LBW were 2.56 (95% CI 1.13–5.80) and 2.52 (95% CI 1.22–  
6  
7 213 5.20), respectively (Model 1). However, after adjusting for other covariates (Model 2), the  
8  
9 214 ORs were not significant due to the small sample size: the ORs for HDP and LBW were 2.40  
10  
11 215 (95% CI 0.27–21.2) and 3.59 (95% CI 0.66–19.5), respectively.  
12  
13  
14  
15 216  
16  
17 217

## 18 218 **DISCUSSION**

19  
20  
21 219 During the first wave of the COVID-19 pandemic in Japan, the incidence of HTP use among  
22  
23 220 pregnant women exceeded 10%, and there was a suspected association of HTP use and  
24  
25 221 perinatal risk of HDP and LBW. However, after adjusting for potential explanatory factors,  
26  
27 222 there was no significant association, which may be due to the weak statistical power because  
28  
29 223 of the small sample size.  
30  
31

32  
33 224 To the best of our knowledge, this is the first report of a potential association between  
34  
35 225 HTP use and perinatal risks. Although smoking plays a controversial role,[10] recent  
36  
37 226 evidence suggests that combustible cigarette smoking is associated with increased HDP  
38  
39 227 risk.[11, 12] Although the biological and genetic pathways (e.g., CYP2A6 and nicotine)  
40  
41 228 underlying the associations observed in different phenotypes of HDP (e.g., preeclampsia and  
42  
43 229 gestational hypertension) have not been elucidated,[20] HDP is recognized as a systemic  
44  
45 230 disease attributable to placental circulatory dysfunction.[21] In experimental research, aerosol  
46  
47 231 from HTPs was found to damage vascular endothelial function in rats.[6] Therefore, the  
48  
49 232 association between HDP risk and HTP use may involve acute and chronic vascular damage,  
50  
51 233 irrespective of combustible cigarette smoking. Furthermore, as concluded in a recent  
52  
53 234 systematic review, smoking is a strong risk factor for LBW.[22] Thus, given the fact that  
54  
55 235 HTPs are smoking devices, our observed results are in line with established reports.  
56  
57  
58  
59  
60



1  
2  
3 236 Although HTP-related unfavorable health outcomes (e.g., acute respiratory and  
4  
5 237 cardiovascular risks) are likely to occur,[6, 7] the impression of HTPs as a healthy alternative  
6  
7  
8 238 is promoted by HTP use advertisements.[5] The Japanese HTP market share accounted for  
9  
10 239 21% of total tobacco sales in 2018, and the weak restrictions on tobacco advertisements and  
11  
12 240 promotion in this country contribute to increased HTP use.[23] Among currently pregnant  
13  
14 241 women, approximately 4% of former combustible cigarette smokers reported smoking HTPs  
15  
16  
17 242 in the present study. This result might explain the change from combustible cigarettes to HTP  
18  
19 243 smoking during pregnancy. In a setting of weak tobacco restrictions such as Guatemala, even  
20  
21 244 though the prevalence of HTP use is low (2.9%) among adolescents, a high prevalence is  
22  
23  
24 245 anticipated.[4] However, our findings imply that HTP use is not a healthy alternative.  
25  
26 246 Evidence for unfavorable HTP-related health outcomes is still insufficient, particularly  
27  
28 247 among reproductive age women. In addition, the impact of multidimensional factors of the  
29  
30 248 COVID-19 pandemic (e.g., the infection, mental health, and socioeconomic factors) and the  
31  
32 249 smoking behaviors of others (e.g., partners and family) on the association between HTP use  
33  
34  
35 250 and perinatal risks remains unknown. The ongoing JACSIS study may provide updates in this  
36  
37  
38 251 regard.

39  
40 252 Our study has limitations. First, this web-based, self-reported, cross-sectional study had  
41  
42 253 a small sample size, which may thus involve a selection bias and weak statistical precision,  
43  
44 254 and it cannot provide an explanation of the causal mechanisms between HTP use and  
45  
46  
47 255 perinatal risks. Due to the lack of information on HTP smoking during pregnancy, the direct  
48  
49 256 impact of HTP smoking on pregnancy outcomes could not be assessed. Furthermore, details  
50  
51 257 on the participants' medical histories including relevant comorbidities, and detailed smoking  
52  
53  
54 258 information such as smoking intensity and duration of smoking abstinence were not  
55  
56 259 available. In addition, electronic cigarette use was not assessed. However, the prevalences of  
57  
58 260 HDP and HTP smokers were mostly parallel to the general population in Japan.[2, 3, 16] The  
59  
60

1  
2  
3 261 incidence of HTP use did not differ between post-delivery and currently pregnant women in  
4  
5 262 our study. Second, recall and reporting bias of HTP use could not be discarded, as suggested  
6  
7  
8 263 in a study on combustible cigarette and electronic cigarette smoking.[4] Because self-report-  
9  
10 264 based smoking status among pregnant women tends to misclassify ever smokers as never  
11  
12 265 smokers,[24] our estimates might be biased toward the null. Third, the perinatal clinical  
13  
14 266 information was self-reported and not based on medical charts, thereby limiting the precision  
15  
16  
17 267 of the results. However, all participants were asked to base their responses on information in  
18  
19 268 their Maternal and Child Health Handbooks, a well-established home-based maternal and  
20  
21 269 neonatal record during pregnancy.[18] Therefore, this limitation might not have affected our  
22  
23  
24 270 results, or at least not largely. Despite these limitations, all HTPs that were available during  
25  
26 271 the study period were assessed. This is the first report on the status of HTP use among  
27  
28 272 pregnant women in Japan, and it highlights the potentially elevated maternal and neonatal  
29  
30  
31 273 risks associated with HTP use. Additionally, to date, besides the present study, no other  
32  
33 274 human studies have assessed the potential effect of the maternal use of new tobacco products  
34  
35 275 (i.e., e-cigarettes and HTPs) on perinatal health.[25] Therefore, our findings shed light and  
36  
37 276 motivate further investigations to assess the life-threatening perinatal risks associated with  
38  
39  
40 277 new tobacco products.

41  
42 278 In conclusion, the incidence of HTP use seems to exceed 10% among pregnant women,  
43  
44 279 and HTP smoking may be associated with increased maternal and neonatal risks in Japan.  
45  
46  
47 280 Undoubtedly, smoking in reproductive age women can cause unfavorable perinatal  
48  
49 281 outcomes.[26] Hence, efforts should be made to investigate the risk of HTP use in  
50  
51 282 reproductive age women, to prevent life-threatening perinatal complications and deaths.  
52  
53  
54 283  
55  
56 284  
57  
58  
59  
60

1  
2  
3 285 **Acknowledgments:** We would like to thank Editage (www.editage.com) for English  
4  
5 286 language editing.

7  
8 287 **Funding:** This study was partly supported by Health, Labour and Welfare Sciences Research  
9  
10 288 Grants (20FA1005) and the Japan Society for the Promotion of Science (JSPS KAKENHI  
11  
12 289 JP18K17351).

14  
15 290 **Data availability statement:** The data that support the findings of this study are available on  
16  
17 291 reasonable request. However, restrictions apply to the availability of these data due to  
18  
19 292 personal identification; research data are not shared. If any person wishes to verify our data,  
20  
21 293 they are most welcome to contact the corresponding author.

23  
24 294 **Conflict of interest:** The authors declare no potential conflicts of interest.

25  
26 295 **Author contributions:** MZ and TT designed the study. TT supervised the study. MZ, YH,  
27  
28 296 and SO developed the methodology. SO, AH, and TT created the dataset. MZ and YH  
29  
30 297 analyzed the data. MZ and YH wrote the first draft of the manuscript. SO, AH, GK, and TT  
31  
32 298 commented on the manuscript. All authors read and approved the final version.

33  
34 299 **Ethics approval:** The study was approved by the Institutional Review Board of the Osaka  
35  
36 300 International Cancer Institute approved the study (Protocol Number 20084).

37  
38 301

39  
40 302

41  
42 303

43  
44

45  
46

47  
48

49  
50

51  
52

53  
54

55  
56

57  
58

59  
60

304 **REFERENCES**

- 305 1 Tabuchi T, Gallus S, Shinozaki T, et al. Heat-not-burn tobacco product use in Japan: its  
306 prevalence, predictors and perceived symptoms from exposure to secondhand heat-not-  
307 burn tobacco aerosol. *Tob Control* 2018;27:e25–e33.
- 308 2 Hori A, Tabuchi T, Kunugita N. Rapid increase in heated tobacco product (HTP) use  
309 from 2015 to 2019: from the Japan “Society and New Tobacco” Internet Survey  
310 (JASTIS). *Tob Control* [Epub ahead of print]. June 05, 2020 [cited 2021 July 08]  
311 [https://doi: 10.1136/tobaccocontrol-2020-055652](https://doi.org/10.1136/tobaccocontrol-2020-055652).
- 312 3 Odani S, Tabuchi T. Prevalence of heated tobacco product use in Japan: the 2020 JASTIS  
313 study. *Tob Control* [Epub ahead of print]. March 11, 2021 [cited 2021 July 08]  
314 [https://doi: 10.1136/tobaccocontrol-2020-056257](https://doi.org/10.1136/tobaccocontrol-2020-056257).
- 315 4 Gottschlich A, Mus S, Monzon JC, et al. Cross-sectional study on the awareness,  
316 susceptibility and use of heated tobacco products among adolescents in Guatemala City,  
317 Guatemala. *BMJ Open*. 2020;10:e039792.
- 318 5 Hair EC, Bennett M, Sheen E, et al. Examining perceptions about IQOS heated tobacco  
319 product: consumer studies in Japan and Switzerland. *Tob Control* 2018;27(Suppl 1):s70–  
320 3.
- 321 6 Nabavizadeh P, Liu J, Havel CM, et al. Vascular endothelial function is impaired by  
322 aerosol from a single IQOS HeatStick to the same extent as by cigarette smoke. *Tob  
323 Control* 2018;27(Suppl 1):s13–9.
- 324 7 Simonavicius E, McNeill A, Shahab L, et al. Heat-not-burn tobacco products: a  
325 systematic literature review. *Tob Control* 2019;28:582–94.
- 326 8 Duley L. The global impact of pre-eclampsia and eclampsia. *Semin Perinatol*  
327 2009;33:130–7.

- 1  
2  
3 328 9 Hasegawa J, Sekizawa A, Tanaka H, et al. Current status of pregnancy-related maternal  
4 mortality in Japan: a report from the Maternal Death Exploratory Committee in Japan.  
5  
6 329  
7  
8 330 *BMJ Open* 2016;6:e010304.  
9  
10 331 10 England L, Zhang J. Smoking and risk of preeclampsia: a systematic review. *Front Biosci*  
11  
12 332 2007;12:2471–83.  
13  
14 333 11 Hayashi K, Matsuda Y, Kawamichi Y, et al. Smoking during pregnancy increases risks of  
15 various obstetric complications: a case-cohort study of the Japan Perinatal Registry  
16  
17 334  
18 Network database. *J Epidemiol* 2011;21:61–6.  
19 335  
20  
21 336 12 Tanaka K, Nishigori H, Watanabe Z, et al. Higher prevalence of hypertensive disorders of  
22 pregnancy in women who smoke: the Japan environment and children’s study. *Hypertens*  
23  
24 337  
25 *Res* 2019;42:558–66.  
26 338  
27  
28 339 13 Rakuten Insight Inc. <https://insight.rakuten.co.jp/en/aboutus.html> (accessed 26 Jun 2021).  
29  
30 340 14 Rakuten Insight Inc. Policies. 2019 (Last updated: Oct 6, 2019)  
31  
32 <https://member.insight.rakuten.co.in/policies> (accessed 26 Jun 2021)  
33 341  
34  
35 342 15 Tabuchi T, Shinozaki T, Kunugita N, et al. Study profile: The Japan “Society and New  
36 Tobacco” Internet Survey (JASTIS): A longitudinal internet cohort study of heat-not-burn  
37  
38 343  
39 tobacco products, electronic cigarettes, and conventional tobacco products in Japan. *J*  
40  
41 344  
42 *Epidemiol* 2019;29:444–50.  
43 345  
44  
45 346 16. Umesawa M, Kobashi G. Epidemiology of hypertensive disorders in pregnancy:  
46 prevalence, risk factors, predictors and prognosis. *Hypertens Res* 2017;40:213–20.  
47 347  
48  
49 348 17 Fujimoto S, Nakamura Y, Ikeda M et al. Utilization of maternal and child health  
50  
51 349  
52 handbook in Japan. *Nihon Koshu Eisei Zasshi* 2001;48:486–94.  
53  
54 350 18 Osaki K, Hattori T, Toda A, et al. Maternal and Child Health Handbook use for maternal  
55  
56 351  
57 and child care: a cluster randomized controlled study in rural Java, Indonesia. *J Public*  
58  
59 352  
60 *Health (Oxf)* 2019;41:170–82.

- 1  
2  
3 353 19 Igarashi A, Aida J, Kusama T, et al. Heated tobacco products have reached younger or  
4  
5  
6 354 more affluent people in Japan. *J Epidemiol* 2021;31:187–93.  
7  
8 355 20 Nakajima M, Yamagishi S, Yamamoto H, et al. Deficient cotinine formation from  
9  
10 356 nicotine is attributed to the whole deletion of the CYP2A6 gene in humans. *Clin*  
11  
12 357 *Pharmacol Ther* 2000;67:57–69.  
13  
14 358 21 Yoshihara T, Zaitu M, Kubota S, et al. Pool walking may improve renal function by  
15  
16  
17 359 suppressing the renin-angiotensin-aldosterone system in healthy pregnant women. *Sci*  
18  
19 360 *Rep* 2020;10:2891.  
20  
21 361 22. Abraham M, Alramadhan S, Iniguez C, et al. A systematic review of maternal smoking  
22  
23  
24 362 during pregnancy and fetal measurements with meta-analysis. *PLOS ONE*  
25  
26 363 2017;12:e0170946.  
27  
28 364 23 Lorraine V. C, Itsuro Y, Geoffrey T.F, et al. Awareness of Marketing of Heated Tobacco  
29  
30  
31 365 Products and Cigarettes and Support for Tobacco Marketing Restrictions in Japan:  
32  
33 366 Findings from the 2018 International Tobacco Control (ITC) Japan Survey. *Int J Environ*  
34  
35 367 *Res Public Health* 2020;17:8418.  
36  
37 368 24 Nishihama Y, Nakayama SF, Tabuchi T, et al. Determination of urinary cotinine cut-off  
38  
39  
40 369 concentrations for pregnant women in the Japan environment and children’s study  
41  
42 370 (JECS). *Int J Environ Res Public Health* 2020;17:5537.  
43  
44 371 25 Larcombe AN. Early-life exposure to electronic cigarettes: cause for concern. *Lancet*  
45  
46 372 *Respir Med* 2019;7:985–92.  
47  
48 373 26 Atrash HK, Johnson K, Adams M, et al. Preconception care for improving perinatal  
49  
50  
51 374 outcomes: the time to act. *Matern Child Health J* 2006;10(Suppl):S3–S11.  
52  
53  
54 375  
55  
56 376

1  
2  
3 377 **FIGURE LEGEND**  
4

5 378 **Figure 1. Odds ratio of ever heated tobacco product smokers with hypertensive**  
6  
7  
8 379 **disorders of pregnancy and low birth weight, compared with never heated tobacco**  
9  
10 380 **product smokers.** Age was adjusted in Model 1, and other covariates (combustible cigarette  
11  
12 381 smoking, educational attainment, occupation, household income, and comorbidity) were  
13  
14 382 additionally adjusted in Model 2. The samples for each analysis in Model 2 were as follows:  
15  
16 383 n=494 (overall), n=370 (never combustible cigarette smokers), and n=124 (ever combustible  
17  
18 384 cigarette smokers) for hypertensive disorders of pregnancy; and n=478 (overall), n=310  
19  
20 385 (never combustible cigarette smokers), and n=118 (ever combustible cigarette smokers) for  
21  
22 386 low birth weight. Abbreviations: HTP, heated tobacco products; OR, Odds ratio.  
23  
24  
25  
26 387  
27  
28  
29 388  
30  
31  
32  
33  
34  
35  
36  
37  
38  
39  
40  
41  
42  
43  
44  
45  
46  
47  
48  
49  
50  
51  
52  
53  
54  
55  
56  
57  
58  
59  
60

389 **Table 1. Characteristics of 558 post-delivery women and 365 currently pregnant women**

| Characteristics                         | N (%) or mean (SD)  |                  |                          |                  |
|-----------------------------------------|---------------------|------------------|--------------------------|------------------|
|                                         | Post-delivery women |                  | Currently pregnant women |                  |
|                                         | Never HTP smokers   | Ever HTP smokers | Never HTP smokers        | Ever HTP smokers |
| Overall                                 | <i>n</i> =493       | <i>n</i> =65     | <i>n</i> =319            | <i>n</i> =46     |
| Maternal and neonatal risk              |                     |                  |                          |                  |
| Hypertensive disorders of pregnancy     | 32 (6.5%)           | 9 (13.8%)*       | NA                       | NA               |
| Low birth weight <2500 g                | 44 (8.9%)           | 12 (18.5%)*      | NA                       | NA               |
| Preterm birth <37 weeks                 | 19 (3.9%)           | 4 (6.2%)         | NA                       | NA               |
| Imminent preterm birth                  | 82 (16.6%)          | 18 (27.7%)*      | NA                       | NA               |
| Age                                     | 32.4 (4.1)          | 30.9 (4.2)**     | 31.9 (4.3)               | 31.3 (4.7)       |
| Ever combustible cigarette smoking      | 82 (16.6%)          | 55 (84.6%***)    | 54 (16.9%)               | 41 (89.1%***)    |
| Educational attainment ≥13 years        | 410 (83.2%)         | 37 (56.9%***)    | 278 (87.1%)              | 31 (67.4%**)     |
| Managerial workers                      | 19 (3.9%)           | 5 (7.7%)         | 16 (5.0%)                | 2 (4.3%)         |
| Comorbidity of hypertension or diabetes | 35 (7.1%)           | 4 (6.2%)         | 4 (1.3%)                 | 4 (8.7%**)       |
| Household income                        | <i>n</i> =436       | <i>n</i> =58     | <i>n</i> =263            | <i>n</i> =41     |
| <200 million JPY                        | 13 (3.0%)           | 3 (5.2%)         | 6 (2.3%)                 | 1 (2.4%)         |
| 200 to <600 million JPY                 | 200 (45.9%)         | 30 (51.7%)       | 115 (43.7%)              | 19 (46.3%)       |
| ≥600 million JPY                        | 223 (51.1%)         | 25 (43.1%)       | 142 (54.0%)              | 21 (51.2%)       |
| Never combustible cigarette smokers     | <i>n</i> =411       | <i>n</i> =10     | <i>n</i> =265            | <i>n</i> =5      |
| Maternal and neonatal risk              |                     |                  |                          |                  |
| Hypertensive disorders of pregnancy     | 26 (6.3%)           | 1 (10.0%)        | NA                       | NA               |
| Low birth weight <2500 g                | 34 (8.3%)           | 3 (30.0%)*       | NA                       | NA               |
| Preterm birth <37 weeks                 | 17 (4.1%)           | 0 (0%)           | NA                       | NA               |
| Imminent preterm birth                  | 69 (16.8%)          | 3 (30.0%)        | NA                       | NA               |
| Age                                     | 32.2 (4.0)          | 33.3 (2.3)       | 31.7 (4.3)               | 30.2 (1.8)       |
| Educational attainment ≥13 years        | 348 (84.7%)         | 7 (70%)          | 235 (88.7%)              | 4 (80.0%)        |
| Managerial workers                      | 16 (3.9%)           | 1 (10%)          | 14 (5.3%)                | 0 (0%)           |



|                                         |               |               |               |              |
|-----------------------------------------|---------------|---------------|---------------|--------------|
| Comorbidity of hypertension or diabetes | 24 (5.8%)     | 0 (0%)        | 4 (1.5%)      | 0 (0%)       |
| Household income                        | <i>n</i> =361 | <i>n</i> =9   | <i>n</i> =219 | <i>n</i> =5  |
| <200 million JPY                        | 10 (2.8%)     | 0 (0%)        | 5 (2.3%)      | 0 (0%)       |
| 200 to <600 million JPY                 | 160 (44.3%)   | 4 (44.4%)     | 97 (44.3%)    | 3 (60.0%)    |
| ≥600 million JPY                        | 191 (52.9%)   | 5 (55.6%)     | 117 (53.45)   | 2 (40.0%)    |
| Ever combustible cigarette smokers      | <i>n</i> =82  | <i>n</i> =55  | <i>n</i> =54  | <i>n</i> =41 |
| Maternal and neonatal risk              |               |               |               |              |
| Hypertensive disorders of pregnancy     | 6 (7.3%)      | 8 (14.5%)     | NA            | NA           |
| Low birth weight <2500 g                | 10 (12.2%)    | 9 (16.4%)     | NA            | NA           |
| Preterm birth <37 weeks                 | 2 (2.4%)      | 4 (7.3%)      | NA            | NA           |
| Imminent preterm birth                  | 13 (15.9%)    | 15 (27.3%)    | NA            | NA           |
| Age                                     | 33.5 (4.3)    | 30.5 (4.3)*** | 32.9 (4.2)    | 31.4 (5.0)   |
| Educational attainment ≥13 years        | 62 (75.6%)    | 30 (54.5%)**  | 43 (79.6%)    | 27 (65.9%)   |
| Managerial workers                      | 3 (3.7%)      | 4 (7.3%)      | 2 (3.7%)      | 2 (4.9%)     |
| Comorbidity of hypertension or diabetes | 11 (13.4%)    | 4 (7.3%)      | 0 (0%)        | 4 (9.8%)*    |
| Household income                        | <i>n</i> =75  | <i>n</i> =49  | <i>n</i> =44  | <i>n</i> =36 |
| <200 million JPY                        | 3 (4.0%)      | 3 (6.1%)      | 1 (2.3%)      | 1 (2.8%)     |
| 200 to <600 million JPY                 | 40 (53.3%)    | 26 (53.1%)    | 18 (40.9%)    | 16 (44.4%)   |
| ≥600 million JPY                        | 32 (42.7%)    | 20 (40.8%)    | 25 (56.8%)    | 19 (52.8%)   |

390 Abbreviation: HTP, heated tobacco product; NA, not applicable.

391 \* $P < 0.05$ , \*\* $P < 0.01$ , \*\*\* $P < 0.001$  for chi-squared test or t-test.

392

393

394 **Table 2. Smoking status and use of heated tobacco products cross-classified according**  
 395 **to combustible cigarette smoking status**

| Characteristics                        | HTP smoking status |            |           |            |
|----------------------------------------|--------------------|------------|-----------|------------|
|                                        | Never              | Former     | Current   | Total      |
| Post-delivery women, <i>total</i>      | 493 (88.4%)        | 50 (9.0%)  | 15 (2.7%) | 558 (100%) |
| Never combustible cigarette smokers    | 411 (97.6%)        | 9 (2.1%)   | 1 (0.2%)  | 421 (100%) |
| Former combustible cigarette smokers   | 79 (64.2%)         | 32 (26.0%) | 12 (9.8%) | 123 (100%) |
| Current combustible cigarette smokers  | 3 (21.4%)          | 9 (64.3%)  | 2 (14.3%) | 14 (100%)  |
| Currently pregnant women, <i>total</i> | 319 (87.4%)        | 42 (11.5%) | 4 (1.1%)  | 365 (100%) |
| Never combustible cigarette smokers    | 265 (98.1%)        | 5 (1.9%)   | 0 (0%)    | 270 (100%) |
| Former combustible cigarette smokers   | 54 (59.3%)         | 33 (36.3%) | 4 (4.4%)  | 91 (100%)  |
| Current combustible cigarette smokers  | 0 (0%)             | 4 (100%)   | 0 (0%)    | 4 (100%)   |

396 Abbreviation: HTP, heated tobacco product.

397



Figure 1. Odds ratio of ever heated tobacco product smokers with hypertensive disorders of pregnancy and low birth weight, compared with never heated tobacco product smokers. Age was adjusted in Model 1, and other covariates (combustible cigarette smoking, educational attainment, occupation, household income, and comorbidity) were additionally adjusted in Model 2. The samples for each analysis in Model 2 were as follows: n=494 (overall), n=370 (never combustible cigarette smokers), and n=124 (ever combustible cigarette smokers) for hypertensive disorders of pregnancy; and n=478 (overall), n=310 (never combustible cigarette smokers), and n=118 (ever combustible cigarette smokers) for low birth weight. Abbreviations: HTP, heated tobacco products; OR, Odds ratio.

139x99mm (300 x 300 DPI)

### Checklist for Reporting Results of Internet E-Surveys (CHERRIES)

| <b>Checklist Item</b>            | <b>Explanation</b>                                                                                                                                                                                                                                                                                                                                                                                                                            | <b>Page Number</b> |
|----------------------------------|-----------------------------------------------------------------------------------------------------------------------------------------------------------------------------------------------------------------------------------------------------------------------------------------------------------------------------------------------------------------------------------------------------------------------------------------------|--------------------|
| Describe survey design           | Describe target population, sample frame. Is the sample a convenience sample? (In "open" surveys this is most likely.)                                                                                                                                                                                                                                                                                                                        | P5                 |
| IRB approval                     | Mention whether the study has been approved by an IRB.                                                                                                                                                                                                                                                                                                                                                                                        | P6                 |
| Informed consent                 | Describe the informed consent process. Where were the participants told the length of time of the survey, which data were stored and where and for how long, who the investigator was, and the purpose of the study?                                                                                                                                                                                                                          | P6                 |
| Data protection                  | If any personal information was collected or stored, describe what mechanisms were used to protect unauthorized access.                                                                                                                                                                                                                                                                                                                       | P5                 |
| Development and testing          | State how the survey was developed, including whether the usability and technical functionality of the electronic questionnaire had been tested before fielding the questionnaire.                                                                                                                                                                                                                                                            | P5                 |
| Open survey versus closed survey | An "open survey" is a survey open for each visitor of a site, while a closed survey is only open to a sample which the investigator knows (password-protected survey).                                                                                                                                                                                                                                                                        | P5                 |
| Contact mode                     | Indicate whether or not the initial contact with the potential participants was made on the Internet. (Investigators may also send out questionnaires by mail and allow for Web-based data entry.)                                                                                                                                                                                                                                            | P5                 |
| Advertising the survey           | How/where was the survey announced or advertised? Some examples are offline media (newspapers), or online (mailing lists – If yes, which ones?) or banner ads (Where were these banner ads posted and what did they look like?). It is important to know the wording of the announcement as it will heavily influence who chooses to participate. Ideally the survey announcement should be published as an appendix.                         | P5                 |
| Web/E-mail                       | State the type of e-survey (eg, one posted on a Web site, or one sent out through e-mail). If it is an e-mail survey, were the responses entered manually into a database, or was there an automatic method for capturing responses?                                                                                                                                                                                                          | P5                 |
| Context                          | Describe the Web site (for mailing list/newsgroup) in which the survey was posted. What is the Web site about, who is visiting it, what are visitors normally looking for? Discuss to what degree the content of the Web site could pre-select the sample or influence the results. For example, a survey about vaccination on an anti-immunization Web site will have different results from a Web survey conducted on a government Web site | P5                 |
| Mandatory/voluntary              | Was it a mandatory survey to be filled in by every visitor who wanted to enter the Web site, or was it a voluntary survey?                                                                                                                                                                                                                                                                                                                    | P5                 |
| Incentives                       | Were any incentives offered (eg, monetary, prizes, or non-monetary incentives such as an offer to provide the survey results)?                                                                                                                                                                                                                                                                                                                | Yes (P5)           |

|    |                                                                                                           |                                                                                                                                                                                                                                                                                                                                                                                                                                                                                               |          |
|----|-----------------------------------------------------------------------------------------------------------|-----------------------------------------------------------------------------------------------------------------------------------------------------------------------------------------------------------------------------------------------------------------------------------------------------------------------------------------------------------------------------------------------------------------------------------------------------------------------------------------------|----------|
| 1  | Time/Date                                                                                                 | In what timeframe were the data collected?                                                                                                                                                                                                                                                                                                                                                                                                                                                    | P5       |
| 2  | Randomization of items or questionnaires                                                                  | To prevent biases items can be randomized or alternated.                                                                                                                                                                                                                                                                                                                                                                                                                                      | Not used |
| 3  | Adaptive questioning                                                                                      | Use adaptive questioning (certain items, or only conditionally displayed based on responses to other items) to reduce number and complexity of the questions.                                                                                                                                                                                                                                                                                                                                 | Yes      |
| 4  | Number of Items                                                                                           | What was the number of questionnaire items per page? The number of items is an important factor for the completion rate.                                                                                                                                                                                                                                                                                                                                                                      | P5       |
| 5  | Number of screens (pages)                                                                                 | Over how many pages was the questionnaire distributed? The number of items is an important factor for the completion rate.                                                                                                                                                                                                                                                                                                                                                                    | P5       |
| 6  | Completeness check                                                                                        | It is technically possible to do consistency or completeness checks before the questionnaire is submitted. Was this done, and if "yes", how (usually JavaScript)? An alternative is to check for completeness after the questionnaire has been submitted (and highlight mandatory items). If this has been done, it should be reported. All items should provide a non-response option such as "not applicable" or "rather not say", and selection of one response option should be enforced. | No       |
| 7  | Review step                                                                                               | State whether respondents were able to review and change their answers (eg, through a Back button or a Review step which displays a summary of the responses and asks the respondents if they are correct).                                                                                                                                                                                                                                                                                   | No       |
| 8  | Unique site visitor                                                                                       | If you provide view rates or participation rates, you need to define how you determined a unique visitor. There are different techniques available, based on IP addresses or cookies or both.                                                                                                                                                                                                                                                                                                 | P5       |
| 9  | View rate (Ratio of unique survey visitors/unique site visitors)                                          | Requires counting unique visitors to the first page of the survey, divided by the number of unique site visitors (not page views!). It is not unusual to have view rates of less than 0.1 % if the survey is voluntary.                                                                                                                                                                                                                                                                       | N/A      |
| 10 | Participation rate (Ratio of unique visitors who agreed to participate/unique first survey page visitors) | Count the unique number of people who filled in the first survey page (or agreed to participate, for example by checking a checkbox), divided by visitors who visit the first page of the survey (or the informed consents page, if present). This can also be called "recruitment" rate.                                                                                                                                                                                                     | P5       |
| 11 | Completion rate (Ratio of users who finished the survey/users who                                         | The number of people submitting the last questionnaire page, divided by the number of people who agreed to participate (or submitted the first survey page). This is only relevant if there is a separate "informed consent" page or if the survey goes over several pages. This is a measure for attrition. Note that                                                                                                                                                                        | N/A      |

|    |                                                     |                                                                                                                                                                                                                                                                                                                                                                                                                                                                                                                                                                            |          |
|----|-----------------------------------------------------|----------------------------------------------------------------------------------------------------------------------------------------------------------------------------------------------------------------------------------------------------------------------------------------------------------------------------------------------------------------------------------------------------------------------------------------------------------------------------------------------------------------------------------------------------------------------------|----------|
| 1  | agreed to participate)                              | "completion" can involve leaving questionnaire items blank. This is not a measure for how completely questionnaires were filled in. (If you need a measure for this, use the word "completeness rate".)                                                                                                                                                                                                                                                                                                                                                                    |          |
| 2  |                                                     |                                                                                                                                                                                                                                                                                                                                                                                                                                                                                                                                                                            |          |
| 3  |                                                     |                                                                                                                                                                                                                                                                                                                                                                                                                                                                                                                                                                            |          |
| 4  |                                                     |                                                                                                                                                                                                                                                                                                                                                                                                                                                                                                                                                                            |          |
| 5  |                                                     |                                                                                                                                                                                                                                                                                                                                                                                                                                                                                                                                                                            |          |
| 6  | Cookies used                                        | Indicate whether cookies were used to assign a unique user identifier to each client computer. If so, mention the page on which the cookie was set and read, and how long the cookie was valid. Were duplicate entries avoided by preventing users access to the survey twice; or were duplicate database entries having the same user ID eliminated before analysis? In the latter case, which entries were kept for analysis (eg, the first entry or the most recent)?                                                                                                   | P5       |
| 7  |                                                     |                                                                                                                                                                                                                                                                                                                                                                                                                                                                                                                                                                            |          |
| 8  |                                                     |                                                                                                                                                                                                                                                                                                                                                                                                                                                                                                                                                                            |          |
| 9  |                                                     |                                                                                                                                                                                                                                                                                                                                                                                                                                                                                                                                                                            |          |
| 10 |                                                     |                                                                                                                                                                                                                                                                                                                                                                                                                                                                                                                                                                            |          |
| 11 | IP check                                            | Indicate whether the IP address of the client computer was used to identify potential duplicate entries from the same user. If so, mention the period of time for which no two entries from the same IP address were allowed (eg, 24 hours). Were duplicate entries avoided by preventing users with the same IP address access to the survey twice; or were duplicate database entries having the same IP address within a given period of time eliminated before analysis? If the latter, which entries were kept for analysis (eg, the first entry or the most recent)? | P5       |
| 12 |                                                     |                                                                                                                                                                                                                                                                                                                                                                                                                                                                                                                                                                            |          |
| 13 |                                                     |                                                                                                                                                                                                                                                                                                                                                                                                                                                                                                                                                                            |          |
| 14 |                                                     |                                                                                                                                                                                                                                                                                                                                                                                                                                                                                                                                                                            |          |
| 15 |                                                     |                                                                                                                                                                                                                                                                                                                                                                                                                                                                                                                                                                            |          |
| 16 |                                                     |                                                                                                                                                                                                                                                                                                                                                                                                                                                                                                                                                                            |          |
| 17 |                                                     |                                                                                                                                                                                                                                                                                                                                                                                                                                                                                                                                                                            |          |
| 18 | Log file analysis                                   | Indicate whether other techniques to analyze the log file for identification of multiple entries were used. If so, please describe.                                                                                                                                                                                                                                                                                                                                                                                                                                        | P5       |
| 19 |                                                     |                                                                                                                                                                                                                                                                                                                                                                                                                                                                                                                                                                            |          |
| 20 |                                                     |                                                                                                                                                                                                                                                                                                                                                                                                                                                                                                                                                                            |          |
| 21 | Registration                                        | In "closed" (non-open) surveys, users need to login first and it is easier to prevent duplicate entries from the same user. Describe how this was done. For example, was the survey never displayed a second time once the user had filled it in, or was the username stored together with the survey results and later eliminated? If the latter, which entries were kept for analysis (eg, the first entry or the most recent)?                                                                                                                                          | P5       |
| 22 |                                                     |                                                                                                                                                                                                                                                                                                                                                                                                                                                                                                                                                                            |          |
| 23 |                                                     |                                                                                                                                                                                                                                                                                                                                                                                                                                                                                                                                                                            |          |
| 24 |                                                     |                                                                                                                                                                                                                                                                                                                                                                                                                                                                                                                                                                            |          |
| 25 | Handling of incomplete questionnaires               | Were only completed questionnaires analyzed? Were questionnaires which terminated early (where, for example, users did not go through all questionnaire pages) also analyzed?                                                                                                                                                                                                                                                                                                                                                                                              | P5       |
| 26 |                                                     |                                                                                                                                                                                                                                                                                                                                                                                                                                                                                                                                                                            |          |
| 27 |                                                     |                                                                                                                                                                                                                                                                                                                                                                                                                                                                                                                                                                            |          |
| 28 | Questionnaires submitted with an atypical timestamp | Some investigators may measure the time people needed to fill in a questionnaire and exclude questionnaires that were submitted too soon. Specify the timeframe that was used as a cut-off point, and describe how this point was determined.                                                                                                                                                                                                                                                                                                                              | Not used |
| 29 |                                                     |                                                                                                                                                                                                                                                                                                                                                                                                                                                                                                                                                                            |          |
| 30 |                                                     |                                                                                                                                                                                                                                                                                                                                                                                                                                                                                                                                                                            |          |
| 31 |                                                     |                                                                                                                                                                                                                                                                                                                                                                                                                                                                                                                                                                            |          |
| 32 | Statistical correction                              | Indicate whether any methods such as weighting of items or propensity scores have been used to adjust for the non-representative sample; if so, please describe the methods.                                                                                                                                                                                                                                                                                                                                                                                               | Not used |
| 33 |                                                     |                                                                                                                                                                                                                                                                                                                                                                                                                                                                                                                                                                            |          |
| 34 |                                                     |                                                                                                                                                                                                                                                                                                                                                                                                                                                                                                                                                                            |          |
| 35 |                                                     |                                                                                                                                                                                                                                                                                                                                                                                                                                                                                                                                                                            |          |

36 This checklist has been modified from Eysenbach G. Improving the quality of Web surveys: the Checklist for Reporting Results of Internet E-Surveys (CHERRIES). J Med Internet Res. 2004 Sep 29;6(3):e34 [erratum in J Med Internet Res. 2012; 14(1): e8.]. Article available at  
37 <https://www.jmir.org/2004/3/e34/>; erratum available <https://www.jmir.org/2012/1/e8/>. Copyright ©Gunther Eysenbach. Originally published in the  
38 [Journal of Medical Internet](https://www.jmir.org/2004/3/e34/) Research, 29.9.2004 and 04.01.2012.  
39  
40

1  
2  
3 This is an open-access article distributed under the terms of the Creative Commons Attribution License (<https://creativecommons.org/licenses/by/2.0/>),  
4 which permits unrestricted use, distribution, and reproduction in any medium, provided the original work, first published in the Journal of Medical Internet  
5 Research, is properly cited.  
6  
7  
8  
9  
10  
11  
12  
13  
14  
15  
16  
17  
18  
19  
20  
21  
22  
23  
24  
25  
26  
27  
28  
29  
30  
31  
32  
33  
34  
35  
36  
37  
38  
39  
40  
41  
42  
43  
44  
45  
46

For peer review only
